# Supplementary material for: Illuminating the Past: Coral Reefs Facilitate Diversification of Biofluorescence in Ray-finned Fishes
Source: Research Square preprint supplement (doi:10.21203/rs.3.rs-4513221/v1), 2024-07-19
Supplement: Supplementary file 2 [file Supplementary 1.xlsx]

## Sheet: Fluor sp
Order	Family	Genus_Species	Red	Green	Red and Green	Citation	Notes
Anguilliformes	Chlopsidae	Kaupichthys brachychirus	1	1	1	Sparks et al. 2014
Anguilliformes	Chlopsidae	Kaupichthys hyoproroides	1	1	1	Sparks et al. 2014
Anguilliformes	Chlopsidae	Kaupichthys nuchalis	1	1	1	Sparks et al. 2014
Anguilliformes	Ophichthidae	Ahlia egmontis	1	1	1	Sparks et al. 2014
Anguilliformes	Ophichthidae	Muraenichthys schultzei	1	1	1	Sparks et al. 2014
Aulopiformes	Synodontidae	Synodus binotatus	1			Anthes et al. 2016
Aulopiformes	Synodontidae	Synodus dermatogenys	1	1	1	Sparks et al. 2014
Aulopiformes	Synodontidae	Synodus saurus	1	1	1	Sparks et al. 2014
Aulopiformes	Synodontidae	Synodus synodus	1	1	1	Sparks et al. 2014
Beryciformes	Holocentridae	Myripristis botche	1			Anthes et al. 2016
Beryciformes	Holocentridae	Myripristis kuntee	1			Anthes et al. 2016
Beryciformes	Holocentridae	Sargocentron caudimaculatum	1			Anthes et al. 2016
Callionymiformes	Callionymidae	Synchiropus bartelsi	1			De Brauwer et al. 2017	Entire body
Callionymiformes	Callionymidae	Synchiropus splendidus	1			De Brauwer et al. 2017	Eyes
Gasterosteiformes	Gasterosteidae	Spinachia spinachia	1			Anthes et al. 2016
Gasterosteiformes	Pegasidae	Eurypegasus draconis	1			Sparks et al. 2014
Gobiesociformes	Gobiesocidae	Diademichthys lineatus	1			Anthes et al. 2016
Gobiesociformes	Gobiesocidae	Lepadogaster candolii	1			Anthes et al. 2016
Lophiiformes	Antennariidae	Antennarius maculatus	1			Sparks et al. 2014
Lophiiformes	Antennariidae	Antennarius pictus	1			De Brauwer et al. 2017	Patches on body + eye + esca
Lophiiformes	Antennariidae	Antennarius rosaceus	1	1	1	New- Solomon island
Lophiiformes	Antennariidae	Antennarius sp.	1			Anthes et al. 2016
Lophiiformes	Antennariidae	Antennarius striatus	1			De Brauwer and Hobbs 2016
Lophiiformes	Ogcocephalidae	Ogcocephalus nasutus	1			Anthes et al. 2016
Perciformes	Acanthuridae	Acanthurus olivaceus	1			Anthes et al. 2016
Perciformes	Blenniidae	Aidablennius sphynx	1			Anthes et al. 2016
Perciformes	Blenniidae	Crossosalarias macrospilus	1			Michiels et al. 2008
Perciformes	Blenniidae	Ecsenius axelrodi	1	1	1	New- Solomon island
Perciformes	Blenniidae	Ecsenius bathi	1			Anthes et al. 2016
Perciformes	Blenniidae	Ecsenius dentex	1			Michiels et al. 2008
Perciformes	Blenniidae	Ecsenius stigmatura	1			Anthes et al. 2016
Perciformes	Blenniidae	Parablennius gattorugine	1			Anthes et al. 2016
Perciformes	Blenniidae	Parablennius incognitus	1			Anthes et al. 2016
Perciformes	Caesionidae	Pterocaesio digramma	1			Anthes et al. 2016
Perciformes	Caesionidae	Pterocaesio tile	1			Anthes et al. 2016
Perciformes	Callionymidae	Callionymus delicatulus	1			Anthes et al. 2016
Perciformes	Callionymidae	Callionymus enneactis	1			Anthes et al. 2016
Perciformes	Callionymidae	Dactylopus dactylopus	1			Anthes et al. 2016
Perciformes	Callionymidae	Dactylopus kuiteri	1			Anthes et al. 2016
Perciformes	Callionymidae	Diplogrammus goramensis	1			Anthes et al. 2016
Perciformes	Callionymidae	Diplogrammus randalli	1			Anthes et al. 2016
Perciformes	Callionymidae	Synchiropus morrisoni	1			Anthes et al. 2016
Perciformes	Callionymidae	Synchiropus moyeri	1			Anthes et al. 2016
Perciformes	Callionymidae	Synchiropus ocellatus	1			Anthes et al. 2016
Perciformes	Callionymidae	Synchiropus picturatus	1			Anthes et al. 2016
Perciformes	Callionymidae	Synchiropus sp.	1			Anthes et al. 2016
Perciformes	Callionymidae	Synchiropus stellatus	1			Anthes et al. 2016
Perciformes	Cepolidae	Cepola marcophthalma	1			Anthes et al. 2016
Perciformes	Chaetodontidae	Chaetodon punctatofasciatus	1			Anthes et al. 2016
Perciformes	Chaetodontidae	Chaetodon xanthurus	1			Anthes et al. 2016
Perciformes	Chaetodontidae	Heniochus varius	1	1	1	Sparks et al. 2014
Perciformes	Cirrhitidae	Cirrhitichthys aprinus	1			Anthes et al. 2016
Perciformes	Cirrhitidae	Cirrhitichthys falco	1			Sparks et al. 2014
Perciformes	Cirrhitidae	Paracirrhites forsteri	1			Anthes et al. 2016
Perciformes	Creediidae	Limnichthys nitidus	1			Sparks et al. 2014
Perciformes	Dactylopteridae	Dactyloptena orientalis	1			Anthes et al. 2016
Perciformes	Dactyloscopidae	Gillellus uranidea	1			Sparks et al. 2014
Perciformes	Epinephelidae	Cephalopholis hemistiktos	1			Anthes et al. 2016
Perciformes	Epinephelidae	Cephalopholis spiloparaea	1			Anthes et al. 2016
Perciformes	Gerreidae	Diapterus auratus	1	1	1	Thurman obs.
Perciformes	Gerreidae	Eucinostomus gula	1	1	1	Thurman obs.
Perciformes	Gobiidae	Gobiid sp.	1			Sparks et al. 2014
Perciformes	Gobiidae	Amblyeleotris latifasciata	1			Anthes et al. 2016
Perciformes	Gobiidae	Bryaninops amplus	1			De Brauwer et al. 2017	Eyes
Perciformes	Gobiidae	Bryaninops loki	1			Anthes et al. 2016
Perciformes	Gobiidae	Bryaninops natans	1			Anthes et al. 2016
Perciformes	Gobiidae	Bryaninops natans	1			Michiels et al. 2008
Perciformes	Gobiidae	Bryaninops ridens	1			Anthes et al. 2016
Perciformes	Gobiidae	Bryaninops ridens	1			Michiels et al. 2008
Perciformes	Gobiidae	Bryaninops yongei	1			Anthes et al. 2016
Perciformes	Gobiidae	Bryaninops yongei	1			Michiels et al. 2008
Perciformes	Gobiidae	Coryphopterus	1	1	1	Sparks et al. 2014
Perciformes	Gobiidae	Ctenogobiops feroculus	1			Anthes et al. 2016
Perciformes	Gobiidae	Ctenogobiops maculosus	1			Michiels et al. 2008
Perciformes	Gobiidae	Ctenogobiops mitodes	1	1	1	Sparks et al. 2014
Perciformes	Gobiidae	Ctenogobiops tangaroai	1			Michiels et al. 2008
Perciformes	Gobiidae	Eviota afelei	1			Anthes et al. 2016
Perciformes	Gobiidae	Eviota atriventris	1			Sparks et al. 2014
Perciformes	Gobiidae	Eviota bifasciata	1			Sparks et al. 2014
Perciformes	Gobiidae	Eviota distigma	1			Michiels et al. 2008
Perciformes	Gobiidae	Eviota dorsogilva	1	1	1	Sparks et al. 2014
Perciformes	Gobiidae	Eviota guttata	1			Michiels et al. 2008
Perciformes	Gobiidae	Eviota latifasciata	1			Anthes et al. 2016
Perciformes	Gobiidae	Eviota melasma	1			Sparks et al. 2014
Perciformes	Gobiidae	Eviota nigriventris	1			Michiels et al. 2008
Perciformes	Gobiidae	Eviota pellucida	1			Michiels et al. 2008
Perciformes	Gobiidae	Eviota prasina	1			Michiels et al. 2008
Perciformes	Gobiidae	Eviota prasites	1			Anthes et al. 2016
Perciformes	Gobiidae	Eviota queenslandica	1			Michiels et al. 2008
Perciformes	Gobiidae	Eviota sebreei	1			Michiels et al. 2008
Perciformes	Gobiidae	Eviota sigillata	1			Anthes et al. 2016
Perciformes	Gobiidae	Eviota sp.	1	1	1	Sparks et al. 2014
Perciformes	Gobiidae	Eviota sp.	1			Sparks et al. 2014
Perciformes	Gobiidae	Eviota sparsa	1	1	1	Sparks et al. 2014
Perciformes	Gobiidae	Eviota spilota	1			New- Solomon island
Perciformes	Gobiidae	Eviota zebrina	1			Michiels et al. 2008
Perciformes	Gobiidae	Fusigobius duospilus	1			Michiels et al. 2008
Perciformes	Gobiidae	Fusigobius longispinus	1			Michiels et al. 2008
Perciformes	Gobiidae	Fusigobius melacron	1			Anthes et al. 2016
Perciformes	Gobiidae	Fusigobius neophytus	1	1	1	Sparks et al. 2014
Perciformes	Gobiidae	Fusigobius pallidus	1			Anthes et al. 2016
Perciformes	Gobiidae	Fusigobius signipinnis	1			Anthes et al. 2016
Perciformes	Gobiidae	Gladiogobius ensifer	1			Sparks et al. 2014
Perciformes	Gobiidae	Gnatholepis anjerensis	1			Michiels et al. 2008
Perciformes	Gobiidae	Gobiodon acicularis	1			Anthes et al. 2016
Perciformes	Gobiidae	Gobiodon citrinus	1	1	1	Sparks et al. 2014
Perciformes	Gobiidae	Gobiodon reticulatus	1			Anthes et al. 2016
Perciformes	Gobiidae	Gobiodon rivulatus	1	1	1	Sparks et al. 2014
Perciformes	Gobiidae	Gobiodon sp.	1			Anthes et al. 2016
Perciformes	Gobiidae	Grallenia arenicola	1			Anthes et al. 2016
Perciformes	Gobiidae	Istigobius decoratus	1			Michiels et al. 2008
Perciformes	Gobiidae	Lebetus guilleti	1			Schliewen et al. 2019	480nm excitation, no longpass filter (blue background)
Perciformes	Gobiidae	Luposicya lupus	1			Anthes et al. 2016
Perciformes	Gobiidae	Paragobiodon echinocephalus	1			Anthes et al. 2016
Perciformes	Gobiidae	Phyllogobius platycephalops	1			Anthes et al. 2016
Perciformes	Gobiidae	Pleurosicya micheli	1	1	1	Michiels et al. 2008
Perciformes	Gobiidae	Pleurosicya mossambica	1			Anthes et al. 2016
Perciformes	Gobiidae	Pleurosicya prognatha	1			Michiels et al. 2008
Perciformes	Gobiidae	Pleurosicya sp.	1			Sparks et al. 2014
Perciformes	Gobiidae	Pomatoschistus quagga	1			Anthes et al. 2016
Perciformes	Gobiidae	Speleogobius trigliodes	1			Anthes et al. 2016
Perciformes	Gobiidae	Stonogobiops yasha	1			Anthes et al. 2016
Perciformes	Gobiidae	Sueviota lachneri	1			New- Solomon island
Perciformes	Gobiidae	Tomiyamichthys oni	1			Anthes et al. 2016
Perciformes	Gobiidae	Trimma avidori	1			Michiels et al. 2008
Perciformes	Labridae	Anampses chrysocephalus	1			Anthes et al. 2016
Perciformes	Labridae	Cheilinus abudjubbe	1			Anthes et al. 2016
Perciformes	Labridae	Choerodon fasciatus	1			Anthes et al. 2016
Perciformes	Labridae	Cirrhilabrus adornatus	1			Anthes et al. 2016
Perciformes	Labridae	Cirrhilabrus aquamarinus	1			Tea et al. 2021
Perciformes	Labridae	Cirrhilabrus aurantidorsalis	1			Anthes et al. 2016
Perciformes	Labridae	Cirrhilabrus beauperryi	1			Sparks obs.
Perciformes	Labridae	Cirrhilabrus chaliasi	1			Tea et al. 2021
Perciformes	Labridae	Cirrhilabrus cyanopleura	1			Anthes et al. 2016, Gerlach et al. 2016
Perciformes	Labridae	Cirrhilabrus lubbocki	1			Anthes et al. 2016, Gerlach et al. 2016
Perciformes	Labridae	Cirrhilabrus punctatus	1			New- Solomon island
Perciformes	Labridae	Cirrhilabrus rubrimarginatus	1			Anthes et al. 2016
Perciformes	Labridae	Cirrhilabrus rubrisquamis	1			Anthes et al. 2016
Perciformes	Labridae	Cirrhilabrus rubriventralis	1			Anthes et al. 2016
Perciformes	Labridae	Cirrhilabrus solorensis	1			Gerlach et al. 2014	Protogynous hermaphrodites, F lack fluorescence
Perciformes	Labridae	Cirrhilabrus tonozukai	1			Anthes et al. 2016
Perciformes	Labridae	Coris caudimacula	1			Anthes et al. 2016
Perciformes	Labridae	Coris gaimard	1			Anthes et al. 2016
Perciformes	Labridae	Coris julis	1			Anthes et al. 2016
Perciformes	Labridae	Halichoeres hartzfeldii	1			Anthes et al. 2016
Perciformes	Labridae	Iniistius melanopus	1			Anthes et al. 2016
Perciformes	Labridae	Iniistius pavo	1			Anthes et al. 2016
Perciformes	Labridae	Labroides dimidiatus	1			Sparks et al. 2014
Perciformes	Labridae	Macropharyngodon sp.	1			Anthes et al. 2016
Perciformes	Labridae	Oxycheilinus mentalis	1			Anthes et al. 2016
Perciformes	Labridae	Oxycheilinus orientalis	1			Anthes et al. 2016
Perciformes	Labridae	Paracheilinus carpenteri	1			Anthes et al. 2016
Perciformes	Labridae	Paracheilinus cyaneus	1			Anthes et al. 2016
Perciformes	Labridae	Paracheilinus filamentosus	1			Anthes et al. 2016
Perciformes	Labridae	Paracheilinus flavianalis	1			Anthes et al. 2016
Perciformes	Labridae	Paracheilinus octotaenia	1			Michiels et al. 2008
Perciformes	Labridae	Pseudocheilinus evanidus	1	1	1	Michiels et al. 2008, Sparks et al. 2014
Perciformes	Labridae	Pseudocheilinus hexataenia	1			Anthes et al. 2016
Perciformes	Labridae	Symphodus cinereus	1			Anthes et al. 2016
Perciformes	Labridae	Symphodus mediterraneus	1			Anthes et al. 2016
Perciformes	Labridae	Symphodus ocellatus	1			Anthes et al. 2016
Perciformes	Labridae	Symphodus roissali	1			Anthes et al. 2016
Perciformes	Labridae	Symphodus rostratus	1			Anthes et al. 2016
Perciformes	Labridae	Symphodus tinca	1			Anthes et al. 2016
Perciformes	Labridae	Thalassoma rueppellii	1			Anthes et al. 2016
Perciformes	Labridae	Wetmorella triocellata	1			Anthes et al. 2016
Perciformes	Labrisomidae	Malacoctenus sp.	1			Sparks et al. 2014
Perciformes	Labrisomidae	Malacoctenus versicolor	1			Sparks et al. 2014
Perciformes	Labrisomidae	Paraclinus marmoratus	1			Sparks et al. 2014
Perciformes	Liparidae	Liparis dennyi	1	1	1	Huie et al. 2022
Perciformes	Liparidae	Liparis florae	1	1	1	Cohen pers obs	soft marbled fluoro all around the face with lime green eyes. soft orange glow along the tail
Perciformes	Liparidae	Liparis gibbus	1	1	1	Gruber and Sparks 2021	Juveniles have both colors, no adults observed
Perciformes	Liparidae	Liparis tunicatus	1			Gruber and Sparks 2021	Adult only red, no juveniles observed
Perciformes	Lutjanidae	Lutjanus rufolineatus	1			Anthes et al. 2016
Perciformes	Mullidae	Upeneus tragula	1			Anthes et al. 2016
Perciformes	Plesiopidae	Calloplesiops altivelis	1			Anthes et al. 2016
Perciformes	Pseudochromidae	Cypho zaps	1			Anthes et al. 2016
Perciformes	Ptereleotridae	Nemateleotris decora	1			Anthes et al. 2016
Perciformes	Scaridae	Scarus tricolor	1			Anthes et al. 2016
Perciformes	Serranidae	Plectranthias inermis	1			Sparks et al. 2014
Perciformes	Serranidae	Plectropomus leopardus	1			De Brauwer et al. 2017	Upper half body
Perciformes	Serranidae	Pseudanthias dispar	1			Anthes et al. 2016
Perciformes	Serranidae	Pseudanthias huchtii	1			Anthes et al. 2016
Perciformes	Serranidae	Pseudanthias pleurotaenia	1			Anthes et al. 2016
Perciformes	Serranidae	Pseudanthias squamipinnis	1			Anthes et al. 2016
Perciformes	Serranidae	Pseudanthias taeniatus	1			Anthes et al. 2016
Perciformes	Serranidae	Serranus cabrilla	1			Anthes et al. 2016
Perciformes	Serranidae	Serranus hepatus	1			Anthes et al. 2016
Perciformes	Serranidae	Variola albimarginata	1			Anthes et al. 2016
Perciformes	Sparidae	Pagellus acarne	1			Anthes et al. 2016
Perciformes	Stichaeidae	Chirolophis nugator	1			Cohen pers obs	the cirri on top of its head have a soft red orange glow as do the stripes along the body tail and spot on the dorsal fin
Perciformes	Synanceiidae	Inimicus didactylus	1			De Brauwer et al. 2017	Entire body
Perciformes	Synanceiidae	Synanceia horrida	1	1	1	De Brauwer et al. 2017	Entire body
Perciformes	Synanceiidae	Synanceia verrucosa	1			De Brauwer et al. 2017	Entire body
Perciformes	Tetrarogidae	Ablabys sp.	1			De Brauwer et al. 2017	Entire body
Perciformes	Tetrarogidae	Centropogon australis	1	1	1	Smith et al. 2018
Perciformes	Tetrarogidae	Paracentropogon longispinis	1			De Brauwer et al. 2017	Entire body
Perciformes	Tetrarogidae	Richardsonichthys leucogaster	1	1	1	De Brauwer et al. 2017	Head
Perciformes	Trachinidae	Trachinus draco	1			Anthes et al. 2016
Perciformes	Tripterygiidae	Ceratobregma helenae	1			De Brauwer et al. 2017	Head + spine
Perciformes	Tripterygiidae	Enneanectes atrorus	1	1	1	Sparks et al. 2014
Perciformes	Tripterygiidae	Enneapterygius abeli	1			Michiels et al. 2008
Perciformes	Tripterygiidae	Enneapterygius cf. tutuilae 1	1			Anthes et al. 2016
Perciformes	Tripterygiidae	Enneapterygius cf. tutuilae 2	1			Anthes et al. 2016
Perciformes	Tripterygiidae	Enneapterygius cf. tutuilae 3	1			Anthes et al. 2016
Perciformes	Tripterygiidae	Enneapterygius cf. tutuilae 4	1			Anthes et al. 2016
Perciformes	Tripterygiidae	Enneapterygius destai	1			Michiels et al. 2008
Perciformes	Tripterygiidae	Enneapterygius flavoccipitis	1			Sparks et al. 2014
Perciformes	Tripterygiidae	Enneapterygius larsonae	1			Anthes et al. 2016
Perciformes	Tripterygiidae	Enneapterygius mirabilis	1			Michiels et al. 2008
Perciformes	Tripterygiidae	Enneapterygius niger	1			New- Solomon island
Perciformes	Tripterygiidae	Enneapterygius pusillus	1			Michiels et al. 2008
Perciformes	Tripterygiidae	Enneapterygius tutuilae	1			De Brauwer et al. 2017	Head + patches on body
Perciformes	Tripterygiidae	Helcogramma capidata	1			New- Solomon island
Perciformes	Tripterygiidae	Helcogramma decurrens	1			Anthes et al. 2016
Perciformes	Tripterygiidae	Helcogramma desa	1			New- Solomon island	Very bright red- good for Recolorize
Perciformes	Tripterygiidae	Helcogramma gymnauchen	1			Anthes et al. 2016
Perciformes	Tripterygiidae	Helcogramma novaecaledoniae	1			Sparks et al. 2014
Perciformes	Tripterygiidae	Helcogramma steinitzi	1			Michiels et al. 2008
Perciformes	Tripterygiidae	Helcogramma striata	1	1	1	Anthes et al. 2016
Perciformes	Tripterygiidae	Tripterygion delaisi	1			Anthes et al. 2016
Perciformes	Tripterygiidae	Tripterygion melanurus	1			Anthes et al. 2016
Perciformes	Tripterygiidae	Tripterygion tripteronotus	1			Anthes et al. 2016
Perciformes	Tripterygiidae	Ucla xenogrammus	1			Michiels et al. 2008
Pleuronectiformes	Bothidae	Asterorhombus cocosensis	1	1	1	Sparks et al. 2014
Pleuronectiformes	Bothidae	Bothus mancus	1			De Brauwer et al. 2017	Body + head
Pleuronectiformes	Bothidae	Bothus pantherinus	1			Anthes et al. 2016
Pleuronectiformes	Bothidae	Bothus podas	1			Anthes et al. 2016
Pleuronectiformes	Bothidae	Engyprosopon grandisquama	1			Anthes et al. 2016
Pleuronectiformes	Paralichthyidae	Citharichthys stigmaeus	1			Cohen pers obs	bright oragne speckles all over the body. Seen in the jouveniles that we have caught, yet to catch an adult
Pleuronectiformes	Samaridae	Samariscus triocellatus	1	1	1	Sparks et al. 2014
Pleuronectiformes	Soleidae	Pardachirus marmoratus	1			Anthes et al. 2016
Pleuronectiformes	Soleidae	Soleichthys heterorhinos	1	1	1	Sparks et al. 2014
Pleuronectiformes	Soleidae	Soleichthys oculofasciatus	1			Sparks et al. 2014
Scorpaeniformes	Aploactinidae	Paraploactis sp.	1			De Brauwer et al. 2017	Face
Scorpaeniformes	Cyclopteridae	Eumicrotremus orbis	1	1	1	Cohen and Summers 2022	M red, F green
Scorpaeniformes	Hexagrammidae	Oxylebius pictus	1			Sparks et al. 2014
Scorpaeniformes	Platycephalidae	Platycephalid sp. (juvenile)	1	1	1	Sparks et al. 2014
Scorpaeniformes	Platycephalidae	Cociella hutchinsi	1	1	1	Sparks et al. 2014
Scorpaeniformes	Platycephalidae	Cymbacephalus beauforti	1	1	1	Sparks et al. 2014
Scorpaeniformes	Platycephalidae	Onigocia spinosa	1			De Brauwer et al. 2017	Entire body
Scorpaeniformes	Platycephalidae	Platycephalid sp. 1	1			Anthes et al. 2016
Scorpaeniformes	Platycephalidae	Platycephalid sp. 2	1			Anthes et al. 2016
Scorpaeniformes	Platycephalidae	Rogadius welanderi	1			De Brauwer et al. 2017	Entire body
Scorpaeniformes	Scorpaenidae	Dendrochirus brachypterus	1			Anthes et al. 2016
Scorpaeniformes	Scorpaenidae	Dendrochirus zebra	1			Anthes et al. 2016
Scorpaeniformes	Scorpaenidae	Helicolenus dactylopterus	1			Anthes et al. 2016
Scorpaeniformes	Scorpaenidae	Pteroidichthys amboinensis	1			De Brauwer et al. 2017	Entire body
Scorpaeniformes	Scorpaenidae	Pterois antennata	1			Sparks et al. 2014
Scorpaeniformes	Scorpaenidae	Pterois volitans	1			Anthes et al. 2016
Scorpaeniformes	Scorpaenidae	Scorpaena guttata	1			Sparks et al. 2014
Scorpaeniformes	Scorpaenidae	Scorpaena notata	1			Anthes et al. 2016
Scorpaeniformes	Scorpaenidae	Scorpaena plumieri	1			Sparks et al. 2014
Scorpaeniformes	Scorpaenidae	Scorpaena porcus	1			Anthes et al. 2016
Scorpaeniformes	Scorpaenidae	Scorpaena scrofa	1			Anthes et al. 2016
Scorpaeniformes	Scorpaenidae	Scorpaenodes caribbaeus	1			Sparks et al. 2014
Scorpaeniformes	Scorpaenidae	Scorpaenodes parvipinnis	1			Anthes et al. 2016
Scorpaeniformes	Scorpaenidae	Scorpaenodes sp.	1			Anthes et al. 2016
Scorpaeniformes	Scorpaenidae	Scorpaenopsis barbata	1			Anthes et al. 2016
Scorpaeniformes	Scorpaenidae	Scorpaenopsis diabolus	1			Sparks et al. 2014
Scorpaeniformes	Scorpaenidae	Scorpaenopsis macrochir	1			De Brauwer et al. 2017	Entire body
Scorpaeniformes	Scorpaenidae	Scorpaenopsis oxycephala	1			De Brauwer et al. 2017	Entire body
Scorpaeniformes	Scorpaenidae	Scorpaenopsis papuensis	1			Sparks et al. 2014
Scorpaeniformes	Scorpaenidae	Scorpaenopsis possi	1			De Brauwer et al. 2017	Entire body
Scorpaeniformes	Scorpaenidae	Scorpaenopsis venosa	1			De Brauwer et al. 2017	Entire body
Scorpaeniformes	Scorpaenidae	Sebastapistes cyanostigma	1			Anthes et al. 2016
Scorpaeniformes	Scorpaenidae	Sebastapistes fowleri	1			New- Solomon island
Scorpaeniformes	Scorpaenidae	Sebastapistes mauritiana	1	1	1	De Brauwer et al. 2017	Head + eyes
Scorpaeniformes	Scorpaenidae	Sebastapistes strongia	1	1	1	Sparks et al. 2014
Scorpaeniformes	Scorpaenidae	Taenianotus triacanthus	1			De Brauwer et al. 2017	Entire body
Scorpaeniformes	Sebastidae	Sebastes constellatus	1			Sparks et al. 2014
Scorpaeniformes	Sebastidae	Sebastes pinniger	1			Sparks et al. 2014
Scorpaeniformes	Synanceiidae	Inimicus sinensis	1			Anthes et al. 2016
Scorpaeniformes	Tetrarogidae	Paracentropogon longispinus	1			Anthes et al. 2016
Scorpaeniformes	Triglidae	Eutrigla gurnardus	1			Anthes et al. 2016
Scorpaeniformes	Triglidae	Trigla lyra	1			Anthes et al. 2016
Scorpaeniformes	Triglidae	Trigloporus lastoviza	1			Anthes et al. 2016
Syngnathiformes	Aulostomidae	Aulostomus chinensis	1			De Brauwer et al. 2017	Margins dorsal and anal fin
Syngnathiformes	Centriscidae	Centriscus scutatus	1			Anthes et al. 2016
Syngnathiformes	Fistulariiidae	Fistularia commersonii	1			De Brauwer et al. 2017	Markings + eye
Syngnathiformes	Solenostomidae	Solenostomus cyanopterus	1			De Brauwer et al. 2017	Entire body
Syngnathiformes	Solenostomidae	Solenostomus halimeda	1			Anthes et al. 2016
Syngnathiformes	Solenostomidae	Solenostomus paradoxus	1			De Brauwer et al. 2017	Entire body
Syngnathiformes	Solenostomidae	Solenostomus sp. ("Velvet")	1			De Brauwer et al. 2017	Entire body
Syngnathiformes	Syngnathidae	Acentronura breviperula	1			Anthes et al. 2016
Syngnathiformes	Syngnathidae	Corythoichthys flavofasciatus	1			Michiels et al. 2008
Syngnathiformes	Syngnathidae	Corythoichthys haematopterus	1			Sparks et al. 2014
Syngnathiformes	Syngnathidae	Corythoichthys intestinalis	1			Anthes et al. 2016
Syngnathiformes	Syngnathidae	Corythoichthys nigripectus	1			Anthes et al. 2016
Syngnathiformes	Syngnathidae	Corythoichthys ocellatus	1			De Brauwer et al. 2017	Entire body
Syngnathiformes	Syngnathidae	Corythoichthys polynotatus	1			Anthes et al. 2016
Syngnathiformes	Syngnathidae	Corythoichthys schultzi	1			Michiels et al. 2008
Syngnathiformes	Syngnathidae	Doryrhamphus janssii	1			Anthes et al. 2016
Syngnathiformes	Syngnathidae	Doryrhamphus japonicus	1			Anthes et al. 2016
Syngnathiformes	Syngnathidae	Doryrhamphus melanopleura	1			Sparks et al. 2014	Eyes
Syngnathiformes	Syngnathidae	Dunckerocampus dactyliophorus	1			Anthes et al. 2016
Syngnathiformes	Syngnathidae	Dunckerocampus pessuliferus	1			Anthes et al. 2016
Syngnathiformes	Syngnathidae	Dunkerocampus pessuliferus	1			Sparks et al. 2014
Syngnathiformes	Syngnathidae	Halicampus macrorhynchus	1			De Brauwer et al. 2017	Entire body
Syngnathiformes	Syngnathidae	Hippichthys cf sp.	1			Anthes et al. 2016
Syngnathiformes	Syngnathidae	Hippocampus bargibanti	1	1	1	De Brauwer et al. 2017	Variable
Syngnathiformes	Syngnathidae	Hippocampus curvicuspis	1			Anthes et al. 2016
Syngnathiformes	Syngnathidae	Hippocampus denise	1	1	1	De Brauwer et al. 2017	Variable
Syngnathiformes	Syngnathidae	Hippocampus erectus	1			Sparks et al. 2014
Syngnathiformes	Syngnathidae	Hippocampus histrix	1	1	1	De Brauwer et al. 2017	Entire body
Syngnathiformes	Syngnathidae	Hippocampus pontohi	1	1	1	De Brauwer et al. 2017	Entire body
Syngnathiformes	Syngnathidae	Hippocampus reidi	1	1	1	Vaccani et al. 2019	Juvenile/adults differ in color patterning
Syngnathiformes	Syngnathidae	Hippocampus severnsi	1			Anthes et al. 2016
Syngnathiformes	Syngnathidae	Hippocampus subelongatus	1			Anthes et al. 2016
Syngnathiformes	Syngnathidae	Phyllopteryx taeniolatus	1			Sparks et al. 2014
Syngnathiformes	Syngnathidae	Syngnathoides biaculeatus	1			Sparks et al. 2014
Syngnathiformes	Syngnathidae	Syngnathus typhle	1			Anthes et al. 2016
Tetraodontiformes	Balistidae	Odonus niger	1			Anthes et al. 2016
Tetraodontiformes	Monacanthidae	Acreichthys tomentosus	1			Anthes et al. 2016
Tetraodontiformes	Monacanthidae	Pervagor melanocephalus	1			Anthes et al. 2016
Zeiformes	Zeidae	Zeus faber	1			Anthes et al. 2016
Acanthuriformes	Sciaenidae	Sciaenidae sp.		1		Thurman obs.
Albuliformes	Albulidae	Albula goreensis		1		Thurman et al. In Review
Albuliformes	Albulidae	Albula vulpes		1		Thurman et al. in Review
Anguilliformes	Anguillidae	Anguilla anguilla		1		Funahashi et al. 2017	Protein described
Anguilliformes	Anguillidae	Anguilla australis		1		Funahashi et al. 2017	Protein described
Anguilliformes	Anguillidae	Anguilla bicolor		1		Funahashi et al. 2017	Protein described
Anguilliformes	Anguillidae	Anguilla japonica		1		Hayashi and Toda 2009	Protein described
Anguilliformes	Anguillidae	Anguilla mossambica		1		Funahashi et al. 2017	Protein described
Anguilliformes	Anguillidae	Anguilla sp.		1		Sparks et al. 2014
Anguilliformes	Chlopsidae	Kaupichthys diodontus		1		Sparks et al. 2014
Anguilliformes	Congridae	Conger cinereus		1		Sparks et al. 2014
Anguilliformes	Congridae	Conger triporiceps		1		Sparks et al. 2014
Anguilliformes	Congridae	Heteroconger hassi		1		Sparks et al. 2014
Anguilliformes	Muraenidae	Echidna polyzona		1		De Brauwer et al. 2017	Entire body
Anguilliformes	Muraenidae	Gymnomuraena zebra		1		Sparks et al. 2014
Anguilliformes	Muraenidae	Gymnothorax fimbriatus		1		De Brauwer et al. 2017	Entire body
Anguilliformes	Muraenidae	Gymnothorax flavimarginatus		1		De Brauwer et al. 2017	Entire body
Anguilliformes	Muraenidae	Gymnothorax pictus		1		Sparks et al. 2014
Anguilliformes	Muraenidae	Gymnothorax richardsonii		1		De Brauwer et al. 2017	Entire body
Anguilliformes	Muraenidae	Gymnothorax robinsi		1		Sparks et al. 2014
Anguilliformes	Muraenidae	Gymnothorax sp.		1		Sparks et al. 2014
Anguilliformes	Muraenidae	Gymnothorax undulatus		1		De Brauwer et al. 2017	Entire body
Anguilliformes	Muraenidae	Gymnothorax zonipectis		1		De Brauwer et al. 2017	Entire body
Anguilliformes	Muraenidae	Muraena lentiginosa		1		Sparks et al. 2014
Anguilliformes	Muraenidae	Rhinomuraena quaesita		1		De Brauwer et al. 2017	Yellow dorsal fin
Anguilliformes	Muraenidae	Uropterygius concolor		1		Sparks et al. 2014
Anguilliformes	Ophichthidae	Brachysomophis henshawi		1		De Brauwer et al. 2017	Eyes + head
Anguilliformes	Ophichthidae	Callechelys marmorata		1		De Brauwer et al. 2017	Snout
Anguilliformes	Ophichthidae	Glass eel (juvenile)		1		Sparks et al. 2014
Anguilliformes	Ophichthidae	Myrichthys breviceps		1		Sparks et al. 2014
Anguilliformes	Ophichthidae	Myrichthys colubrinus		1		Sparks et al. 2014
Anguilliformes	Ophichthidae	Myrichthys maculosus		1		De Brauwer et al. 2017	Entire body
Anguilliformes	Ophichthidae	Ophichthus altipennis		1		De Brauwer et al. 2017	Head
Atheriniformes	Melanotaeniidae	Melanotaenia boesemani		1		Sparks et al. 2014
Aulopiformes	Chlorophthalmidae	Chlorophthalmus sp.		1		Sparks et al. 2014
Aulopiformes	Synodontidae	Saurida gracilis		1		Sparks et al. 2014
Aulopiformes	Synodontidae	Saurida nebulosa		1		De Brauwer et al. 2017	Entire body
Aulopiformes	Synodontidae	Synodus lucioceps		1		Sparks et al. 2014
Aulopiformes	Synodontidae	Synodus rubromarmoratus		1		Sparks et al. 2014
Aulopiformes	Synodontidae	Synodus variegatus		1		Sparks et al. 2014
Beloniformes	Belonidae	Strongylura sp.		1		Thurman obs.
Characiformes	Serrasalmidae	Metynnis argenteus		1		Thurman obs.
Cichliformes	Cichlidae	Andinoacara pulcher		1		Thurman obs.
Cichliformes	Cichlidae	Astronotus ocellatus		1		Thurman obs.
Cypriniformes	Cyprinidae	Tanichthys albonubes		1		Sparks et al. 2014
Cyprinodontiformes	Poeciliidae	Xiphophorus cf. hellerii		1		Sparks et al. 2014
Elopiformes	Elopidae	Elops saurus		1		Thurman obs.
Gobiesociformes	Gobiescocidae	Discotrema crinophilum		1		De Brauwer et al. 2017	Markings
Gobiesociformes	Gobiesocidae	Arcos sp.		1		Sparks et al. 2014
Gobiesociformes	Gobiesocidae	Gobiesox meandricus		1		Huie et al. 2022
Gobiesociformes	Gobiesocidae	Gobiesox sp.		1		Sparks et al. 2014
Istiophoriformes	Sphyraenidae	Sphyraena barracuda		1		Thurman obs.
Lophiiformes	Antennariidae	Antennarius randalli		1		Sparks et al. 2014
Lophiiformes	Himantolophidae	Himantolophus sagamius		1		Ludt and Clardy 2022	Spots on esca (lure)
Ophidiiformes	Bythitidae	Bythitid sp.		1		Sparks et al. 2014
Ophidiiformes	Carapidae	Juvenile carapid		1		Sparks et al. 2014
Osteoglossiformes	Pantodontidae	Pantodon buchholzi		1		Thurman obs.
Perciformes	Acanthuridae	Acanthurus coeruleus		1		Sparks et al. 2014
Perciformes	Acanthuridae	Acanthurus pyroferus		1		Sparks et al. 2014
Perciformes	Apistidae	Apistus carinatus		1		De Brauwer et al. 2017	Entire body
Perciformes	Apogonidae	Apogonid sp.		1		Sparks et al. 2014
Perciformes	Apogonidae	Apogon crassiceps		1		Sparks obs.
Perciformes	Apogonidae	Ostorhinchus nigrofasciatus		1		Sparks obs.
Perciformes	Apogonidae	Pristiapogon abrogramma		1		Sparks et al. 2014
Perciformes	Blenniidae	Ecsenius pictus		1		Sparks et al. 2014
Perciformes	Blenniidae	Salarias segmentatus		1		Sparks et al. 2014
Perciformes	Centropomidae	Centropomus undecimalis		1		Thurman obs.
Perciformes	Chaetodontidae	Chaetodon citrinellus		1		Sparks et al. 2014
Perciformes	Chaetodontidae	Chaetodon octofasciatus		1		Sparks et al. 2014
Perciformes	Chaetodontidae	Forcipiger longirostris		1		Sparks et al. 2014
Perciformes	Ephippidae	Platax boersii		1		Sparks et al. 2014
Perciformes	Epinephelidae	Cephalopholis leopardus		1		Sparks et al. 2014
Perciformes	Gerreidae	Eucinostomus sp.		1		Thurman obs.	Could not identify to species level, but different from other mojarras.
Perciformes	Gerreidae	Gerres cinereus		1		Thurman obs.
Perciformes	Gobiidae	Gobiid sp.		1		Sparks et al. 2014
Perciformes	Gobiidae	Callogobius clitellus		1		New- Solomon island	Very light general green
Perciformes	Gobiidae	Callogobius stellatus		1		Sparks et al. 2014
Perciformes	Gobiidae	Gnatholepsis anjerensis		1		New- Solomon island
Perciformes	Gobiidae	Gobiodon ceramensis		1		Sparks et al. 2014
Perciformes	Gobiidae	Paragobiodon xanthosoma		1		Sparks et al. 2014
Perciformes	Gobiidae	Trimma annosum		1		New- Solomon island
Perciformes	Gobiidae	Trimma benjamini		1		Sparks et al. 2014
Perciformes	Gobiidae	Trimma cheni		1		New- Solomon island
Perciformes	Gobiidae	Trimma macrophthalmum		1		Sparks et al. 2014
Perciformes	Gobiidae	Trimma milta		1		Sparks et al. 2014
Perciformes	Gobiidae	Trimma sp.		1		Sparks et al. 2014
Perciformes	Gobiidae	Trimma striata		1		Sparks et al. 2014
Perciformes	Labridae	Cheilinus chlorourus		1		De Brauwer et al. 2017	Entire body
Perciformes	Labridae	Cheilinus fasciatus		1		Sparks et al. 2014
Perciformes	Labridae	Cheilinus oxycephalus		1		New- Solomon island
Perciformes	Labridae	Cheilinus trilobatus		1		De Brauwer et al. 2017	Entire body
Perciformes	Labridae	Oxycheilinus bimaculatus		1		De Brauwer et al. 2017	Entire body
Perciformes	Labridae	Oxycheilinus celebicus		1		Sparks et al. 2014
Perciformes	Labridae	Oxycheilinus digrammus		1		De Brauwer et al. 2017	Entire body
Perciformes	Labridae	Semicossyphus pulcher		1		Sparks et al. 2014
Perciformes	Labrisomidae	Paraclinus nigripinnis		1		Sparks et al. 2014
Perciformes	Lethrinidae	Monotaxis grandoculis		1		Sparks et al. 2014	Caudal peduncle, juvenile
Perciformes	Liopropomatidae	Liopropoma multilineatum		1		Sparks et al. 2014
Perciformes	Lutjanidae	Lutjanus griseus		1		Thurman obs.
Perciformes	Microdesmidae	Nemateleotris magnifica		1		Sparks et al. 2014
Perciformes	Mullidae	Parupeneus macronemus		1		De Brauwer et al. 2017	Dorsal saddle
Perciformes	Mullidae	Parupeneus multifasciatus		1		Sparks et al. 2014
Perciformes	Mullidae	Pseudupeneus maculatus		1		Sparks et al. 2014
Perciformes	Nemipteridae	Parascolopsis akatamae		1		Miyamoto et al. 2020
Perciformes	Nemipteridae	Parascolopsis eriomma		1		Miyamoto et al. 2020
Perciformes	Nemipteridae	Pentapodus aureofasciatus		1		De Brauwer et al. 2017	Lateral blotches
Perciformes	Nemipteridae	Pentapodus trivittatus		1		Sparks et al. 2014
Perciformes	Nemipteridae	Scolopsis affinis		1		De Brauwer et al. 2017	Variable
Perciformes	Nemipteridae	Scolopsis bilineata		1		Sparks et al. 2014
Perciformes	Nemipteridae	Scolopsis ciliata		1		Sparks et al. 2014
Perciformes	Nemipteridae	Scolopsis lineata		1		Sparks et al. 2014	Top half of body
Perciformes	Nemipteridae	Scolopsis margaritifer		1		Sparks et al. 2014
Perciformes	Nemipteridae	Scolopsis xenochrous		1		De Brauwer et al. 2017	Entire body
Perciformes	Pomacanthidae	Centropyge bicolor		1		Sparks et al. 2014
Perciformes	Pomacanthidae	Centropyge vrolikii		1		Sparks et al. 2014
Perciformes	Pomacentridae	Amphiprion clarkii		1		Sparks et al. 2014
Perciformes	Pomacentridae	Amphiprion percula		1		Sparks et al. 2014
Perciformes	Pomacentridae	Chrysiptera hemicyanea		1		Thurman obs.
Perciformes	Pseudochromidae	Pseudochromis bitaeniatus		1		Sparks et al. 2014
Perciformes	Scorpaenidae	Caracanthus maculatus		1		New- Solomon island
Perciformes	Serranidae	Plectranthias nanus		1		Sparks et al. 2014
Perciformes	Serranidae	Pseudanthias tuka		1		Sparks et al. 2014
Perciformes	Serranidae	Pseudogramma polyacantha		1		Sparks et al. 2014
Perciformes	Serranidae	Pseudogramma sp.		1		Sparks et al. 2014
Perciformes	Serranidae	Rypticus subbifrenatus		1		Sparks et al. 2014
Perciformes	Serranidae	Serranus tigrinus		1		Sparks et al. 2014
Perciformes	Siganidae	Siganus canaliculatus		1		Sparks et al. 2014
Perciformes	Sparidae	Sparisoma radians		1		Sparks et al. 2014
Perciformes	Stichaeidae	Lumpenus sagitta		1		Cohen pers obs	the spines are a bright green glow
Perciformes	Uranoscopidae	Uranoscopus sulphureus		1		De Brauwer et al. 2017	Entire body
Pleuronectiformes	Achiridae	Trinectes maculatus		1		Thurman obs.
Pleuronectiformes	Paralichthyidae	Paralichthys sp.		1		Thurman obs.
Pleuronectiformes	Pleuronectidae	Hippoglossoides platessoides		1		Gruber and Sparks 2021	Weak fluorescence
Pleuronectiformes	Pleuronectidae	Lyopsetta exilis		1		Cohen pers obs	green spots over the body, these correlate with the white patches. dull green glow where there is white marbeling.
Pleuronectiformes	Sepiolidae	Euprymna berryi		1		De Brauwer et al. 2017	Spots on body
Pleuronectiformes	Soleidae	Pardachirus pavoninus		1		De Brauwer et al. 2017	Variabla
Scorpaeniformes	Cottidae	Enophyrs bison		1		Cohen pers obs	bright green fluoro around the eyes potentiall soft green fluoro on the white stripes but hard to see as we onky have very small jouveniles
Scorpaeniformes	Cottidae	Icelinus borealis		1		Cohen pers obs	soft green glow on the preopercle spines
Scorpaeniformes	Cyclopteridae	Cyclopterus lumpus		1		Juhasz‐Dora et al. 2022	Juveniles
Scorpaeniformes	Hemitripteridae	Nautichthys oculofasciatus		1		Sparks et al. 2014	Cohen: bright green eyes. cirri on top of the eyes are orange and the sail is a vibrant orange color. the long dorsal fin has light orange flourscent the large pectoral fins are prange and green fluro
Scorpaeniformes	Hexagrammidae	Hexagrammus decagrammus		1		Cohen pers obs	green fluor around eyes
Scorpaeniformes	Psychrolutidae	Dasycottus setiger		1		Cohen pers obs	lime green around the eyes
Scorpaeniformes	Scorpaenidae	Scorpaenodes hirsutus		1		Sparks et al. 2014
Scorpaeniformes	Scorpaenidae	Scorpaenodes varipinnis		1		Sparks et al. 2014
Scorpaeniformes	Sebastidae	Sebastes dallii		1		Sparks et al. 2014
Scorpaeniformes	Sebastidae	Sebastes maliger		1		Sparks et al. 2014
Siluriformes	Loricariidae	Hypostomus plecostomus		1		Thurman obs.
Syngnathiformes	Centriscidae	Aeoliscus strigatus		1		Sparks et al. 2014
Syngnathiformes	Syngnathidae	Halicampus mataafae		1		De Brauwer et al. 2017	Body
Syngnathiformes	Syngnathidae	Hippocampus zosterae		1		Sparks et al. 2014
Syngnathiformes	Syngnathidae	Trachyrhamphus bicoarctatus		1		De Brauwer et al. 2017	Eye
Tetraodontiformes	Balistidae	Balistapus undulatus		1		Sparks obs.	faint green
Tetraodontiformes	Tetraodontidae	Sphoeroides testudineus		1		Thurman obs.

## Sheet: Non-flour sp
Family	Species	Source
Acanthuridae	Acanthurus auranticavus	De Brauwer et al. 2017
Acanthuridae	Acanthurus blochii	New-Solomon island
Acanthuridae	Acanthurus leucocheilus	De Brauwer et al. 2017
Acanthuridae	Acanthurus maculiceps	De Brauwer et al. 2017
Acanthuridae	Acanthurus mata	De Brauwer et al. 2017
Acanthuridae	Acanthurus nigricans	De Brauwer et al. 2017
Acanthuridae	Acanthurus nigricauda	New-Solomon island
Acanthuridae	Acanthurus nigrofuscus	New-Solomon island
Acanthuridae	Acanthurus nubilus	New-Solomon island
Acanthuridae	Acanthurus thompsoni	New-Solomon island
Acanthuridae	Acanthurus triostegus	De Brauwer et al. 2017
Acanthuridae	Acanthurus xanthopterus	De Brauwer et al. 2017
Acanthuridae	Ctenochaetus binotatus	New-Solomon island
Acanthuridae	Ctenochaetus striatus	De Brauwer et al. 2017
Acanthuridae	Ctenochaetus tominiensis	New-Solomon island
Acanthuridae	Naso lituratus	De Brauwer et al. 2017
Acanthuridae	Naso thynnoides	De Brauwer et al. 2017
Acanthuridae	Naso vlamingii	De Brauwer et al. 2017
Acanthuridae	Zebrasoma scopas	De Brauwer et al. 2017
Acanthuridae	Zebrasoma velifer	De Brauwer et al. 2017
Acanthuridae	Zebrasoma veliferum	New-Solomon island
Acropomatidae	Synagrops japonicus	New-Solomon island
Agonidae	Agonopsis vulsa	Cohen per obs
Agonidae	Anoplagonus inermis	Cohen per obs
Agonidae	Anoplarchus purpurascens	Cohen per obs
Agonidae	Bathyagonus pentacanthus	Cohen per obs
Agonidae	Bothragonus swanii	Cohen per obs
Ammodytidae	Amodytes personatus	Cohen per obs
Anarhichadidae	Anarrhichthys ocellatus	Sparks obs.
Anomalopidae	Anomalops katoptron	New-Solomon island
Antennariidae	Antennarius commerson	Sparks obs.
Apogonidae	Apogon bandanensis	De Brauwer et al. 2017
Apogonidae	Apogon cyanosoma	De Brauwer et al. 2017
Apogonidae	Apogon novemfasciatus	De Brauwer et al. 2017
Apogonidae	Apogon taeniophorus	De Brauwer et al. 2017
Apogonidae	Apogonichthyoides melas	New-Solomon island
Apogonidae	Archamia macroptera	New-Solomon island
Apogonidae	Cheilodipterus alleni	New-Solomon island
Apogonidae	Cheilodipterus artus	New-Solomon island
Apogonidae	Cheilodipterus isostigma	New-Solomon island
Apogonidae	Cheilodipterus macrodon	De Brauwer et al. 2017
Apogonidae	Cheilodipterus quinquelineatus	De Brauwer et al. 2017
Apogonidae	Cheilodipterus singapurensis	New-Solomon island
Apogonidae	Fibramia lateralis	New-Solomon island
Apogonidae	Fibramia thermalis	New-Solomon island
Apogonidae	Fowleria aurita	New-Solomon island
Apogonidae	Fowleria marmorata	New-Solomon island
Apogonidae	Fowleria vaiulae	New-Solomon island
Apogonidae	Fowleria variegata	New-Solomon island
Apogonidae	Gymnapogon urospilotus	New-Solomon island
Apogonidae	Nectamia bandanensis	De Brauwer et al. 2017
Apogonidae	Nectamia viria	New-Solomon island
Apogonidae	Ostorhinchus angustatus	New-Solomon island
Apogonidae	Ostorhinchus compressus	New-Solomon island
Apogonidae	Ostorhinchus multilineatus	New-Solomon island
Apogonidae	Ostorhinchus novemfasciatus	New-Solomon island
Apogonidae	Pristiapogon fraenatus	New-Solomon island
Apogonidae	Pristiapogon kallopterus	New-Solomon island
Apogonidae	Pristicon trimaculatus	New-Solomon island
Apogonidae	Pseudamia amblyuroptera	New-Solomon island
Apogonidae	Pseudamia gelatinosa	New-Solomon island
Apogonidae	Pseudamiops gracilicauda	New-Solomon island
Apogonidae	Pterapogon kauderni	De Brauwer et al. 2017
Apogonidae	Sphaeramia orbicularis	New-Solomon island
Apogonidae	Zoramia leptacanthus	New-Solomon island
Atherinidae	Hypoatherina temmincki	New-Solomon island
Aulorhynchidae	Aulorhynchus flavidus	Cohen per obs
Balistidae	Melichthys niger	De Brauwer et al. 2017
Balistidae	Melichthys vidua	New-Solomon island
Balistidae	Odunus niger	De Brauwer et al. 2017
Balistidae	Rhinecanthus verrucosus	New-Solomon island
Belonidae	Strongylura incisa	New-Solomon island
Belonidae	Tylosurus punctulatus	New-Solomon island
Blenniidae	Aspidontus taeniatus	New-Solomon island
Blenniidae	Cirripectes stigmaticus	New-Solomon island
Blenniidae	Ecsenius namiyei	New-Solomon island
Blenniidae	Ecsenius prooculis	New-Solomon island
Blenniidae	Ecsenius sellifer	New-Solomon island
Blenniidae	Ecsenius trilineatus	New-Solomon island
Blenniidae	Ecsenius yaeyamaensis	New-Solomon island
Blenniidae	Meiacanthus atrodorsalis	New-Solomon island
Blenniidae	Meiacanthus grammistes	New-Solomon island
Blenniidae	Petroscirtes thepassii	New-Solomon island
Blenniidae	Plagiotremus laudandus	New-Solomon island
Blenniidae	Plagiotremus rhinorhynchus	New-Solomon island
Blenniidae	Salarias guttatus	New-Solomon island
Caesionidae	Caesio caerulaurea	New-Solomon island
Caesionidae	Gymnocaesio gymnopterus	New-Solomon island
Caesionidae	Pterocaesio pisang	New-Solomon island
Carangidae	Carangoides bartholomaei	Thurman pers obs
Carangidae	Decapterus kurroides	New-Solomon island
Ceratiidae	Ceratias holboelli	New-Solomon island
Chaetodontidae	Chaetodon auriga	De Brauwer et al. 2017
Chaetodontidae	Chaetodon baronessa	De Brauwer et al. 2017
Chaetodontidae	Chaetodon ephippium	De Brauwer et al. 2017
Chaetodontidae	Chaetodon kleinii	De Brauwer et al. 2017
Chaetodontidae	Chaetodon lunula	New-Solomon island
Chaetodontidae	Chaetodon lunulatus	De Brauwer et al. 2017
Chaetodontidae	Chaetodon ornatissimus	De Brauwer et al. 2017
Chaetodontidae	Chaetodon rafflesi	De Brauwer et al. 2017
Chaetodontidae	Chaetodon semion	De Brauwer et al. 2017
Chaetodontidae	Chaetodon speculum	New-Solomon island
Chaetodontidae	Chaetodon trifascialis	De Brauwer et al. 2017
Chaetodontidae	Chaetodon trifasciatus	De Brauwer et al. 2017
Chaetodontidae	Chaetodon ulietensis	De Brauwer et al. 2017
Chaetodontidae	Chaetodon unimaculatus	De Brauwer et al. 2017
Chaetodontidae	Chaetodon vagabundus	De Brauwer et al. 2017
Chaetodontidae	Chelmon rostratus	New-Solomon island
Chaetodontidae	Forcipiger flavissimus	New-Solomon island
Chaetodontidae	Heniochus acuminatus	De Brauwer et al. 2017
Chaetodontidae	Heniochus chrysostomus	De Brauwer et al. 2017
Chaetodontidae
Chlopsidae	Kaupichthys atronasus	New-Solomon island
Cichlidae	Mbuna sp.	Sparks obs.
Cichlidae	Symphysodon sp.	Sparks obs.
Cirrhitidae	Amblycirrhitus bimacula	New-Solomon island
Cirrhitidae	Oxycirrhites typus	De Brauwer et al. 2017
Cirrhitidae	Paracirrhites arcatus	De Brauwer et al. 2017
Cirrhitidae	Paracirrhites hemistictus	De Brauwer et al. 2017
Cottidae	Oligocottus maculosus	Cohen per obs
Cottidae	Podothecus accipenserinus	Cohen per obs
Dasyatidae	Taeniura lymma	De Brauwer et al. 2017
Diodontidae	Chilomycterus schoepfi	Thurman pers obs
Diodontidae	Cyclichthys orbicularis	De Brauwer et al. 2017
Diodontidae	Diodon holocanthus	De Brauwer et al. 2017
Diodontidae	Diodon liturosus	De Brauwer et al. 2017
Diretmidae	Diretmoides parini	New-Solomon island
Eleotridae	Calumia godeffroyi	New-Solomon island
Embiotocidae	Cymatogaster aggregata	Cohen per obs
Embiotocidae	Embiotoca jacksoni	Sparks obs.
Embiotocidae	Embiotoca lateralis	Sparks obs.
Embiotocidae	Hypsurus caryi	Sparks obs.
Engraulidae	Encrasicholina pseudoheteroloba	New-Solomon island
Evermannellidae	Odontostomops normalops	New-Solomon island
Exocoetidae	Cheilopogon arcticeps	New-Solomon island
Fundulidae	Fundulus similis	Sparks obs.
Gadidae	Gadus chalcogrammus	Cohen per obs
Gadidae	Gadus macrocephalus	Cohen per obs
Gerreidae	Gerres erythrourus	New-Solomon island
Giganturidae	Gigantura indica	New-Solomon island
Gobiidae	Amblyeleotris guttata	New-Solomon island
Gobiidae	Amblygobius buanensis	New-Solomon island
Gobiidae	Amblygobius nocturnus	New-Solomon island
Gobiidae	Amblygobius phalaena	De Brauwer et al. 2017
Gobiidae	Asterropteryx bipunctata	New-Solomon island
Gobiidae	Asterropteryx ensiferus	New-Solomon island
Gobiidae	Asterropteryx semipunctata	New-Solomon island
Gobiidae	Asterropteryx semipunctatus	De Brauwer et al. 2017
Gobiidae	Asterropteryx spinosa	New-Solomon island
Gobiidae	Asterropteryx striata	New-Solomon island
Gobiidae	Bathygobius cotticeps	New-Solomon island
Gobiidae	Callogobius hasselti	New-Solomon island
Gobiidae	Callogobius sclateri	New-Solomon island
Gobiidae	Cryptocentrus strigilliceps	New-Solomon island
Gobiidae	Eviota epistigmata	New-Solomon island
Gobiidae	Exyrias belissimus	New-Solomon island
Gobiidae	Exyrias puntang	New-Solomon island
Gobiidae	Gnatholepis davaoensis	New-Solomon island
Gobiidae	Gobiodon heterospilos	New-Solomon island
Gobiidae	Gobiodon quinquestrigatus	New-Solomon island
Gobiidae	Istigobius ornatus	New-Solomon island
Gobiidae	Koumansetta rainfordi	New-Solomon island
Gobiidae	Pleurosicya carolinensis	New-Solomon island
Gobiidae	Priolepis cincta	New-Solomon island
Gobiidae	Priolepis inhaca	New-Solomon island
Gobiidae	Trimma emeryi	New-Solomon island
Gobiidae	Trimma lantana	New-Solomon island
Gobiidae	Trimma nasa	New-Solomon island
Gobiidae	Trimma okinawae	New-Solomon island
Gobiidae	Trimma papayum	New-Solomon island
Gobiidae	Trimma sp.	De Brauwer et al. 2017
Gobiidae	Trimma stobbsi	New-Solomon island
Gobiidae	Trimma tevegae	New-Solomon island
Gobiidae	Valenciennea muralis	New-Solomon island
Gobiidae	Valenciennea sexguttata	New-Solomon island
Gobiidae	Valenciennea strigata	New-Solomon island
Gobiidae	Valenciennea strigata (juvenile)	De Brauwer et al. 2017
Gonostomatidae	Cyclothone alba	New-Solomon island
Gonostomatidae	Diplophos pacificus	New-Solomon island
Gonostomatidae	Diplophos taenia	New-Solomon island
Gonostomatidae	Gonostoma elongatum	New-Solomon island
Gonostomatidae	Margrethia obtusirostra	New-Solomon island
Haemulidae	Plectorhinchus chaetodonoides	New-Solomon island
Haemulidae	Plectrorhinchus vittatus	De Brauwer et al. 2017
Hemitripteridae	Blepsias cirrhosus	Cohen per obs
Holocentridae	Myripristis adustus	New-Solomon island
Holocentridae	Myripristis berndti	New-Solomon island
Holocentridae	Myripristis hexagona	New-Solomon island
Holocentridae	Myripristis murdjan	De Brauwer et al. 2017
Holocentridae	Myripristis pralinia	De Brauwer et al. 2017
Holocentridae	Myripristis violacea	New-Solomon island
Holocentridae	Myripristis vittata	New-Solomon island
Holocentridae	Neoniphon argenteus	New-Solomon island
Holocentridae	Neoniphon sammara	De Brauwer et al. 2017
Holocentridae	Plectrypops lima	New-Solomon island
Holocentridae	Sargocentron cornutum	New-Solomon island
Holocentridae	Sargocentron diadema	De Brauwer et al. 2017
Holocentridae	Sargocentron microstoma	New-Solomon island
Holocentridae	Sargocentron praslin	New-Solomon island
Holocentridae	Sargocentron punctatissimum	New-Solomon island
Holocentridae	Sargocentron rubrum	New-Solomon island
Holocentridae	Sargocentron spiniferum	New-Solomon island
Holocentridae	Sargocentron tiere	De Brauwer et al. 2017
Holocentridae	Sargocentron tiereoides	New-Solomon island
Holocentridae	Sargocentron violaceum	New-Solomon island
Isonidae	Iso rhothophilus	New-Solomon island
Labridae	Anampses caeruleopunctatus (juveniles)	De Brauwer et al. 2017
Labridae	Bodianus mesothorax	New-Solomon island
Labridae	Choerodon anchorago	New-Solomon island
Labridae	Cirrhilabrus exquisitus	New-Solomon island
Labridae	Cirrhilabrus walindi	New-Solomon island
Labridae	Diproctacanthus xanthurus	New-Solomon island
Labridae	Epibulus insidiator	New-Solomon island
Labridae	Gomphosus varius	De Brauwer et al. 2017
Labridae	Halichoeres argus	New-Solomon island
Labridae	Halichoeres chloropterus	New-Solomon island
Labridae	Halichoeres hortulanus	New-Solomon island
Labridae	Halichoeres hortulanus (juvenile)	De Brauwer et al. 2017
Labridae	Halichoeres leucurus	New-Solomon island
Labridae	Halichoeres marginatus	New-Solomon island
Labridae	Halichoeres papilionaceus	New-Solomon island
Labridae	Halichoeres prosopeion	New-Solomon island
Labridae	Halichoeres scapularis	New-Solomon island
Labridae	Halichoeres trimaculatus	De Brauwer et al. 2017
Labridae	Hemigymnus melapterus (juvenile)	De Brauwer et al. 2017
Labridae	Iniistius aneitensis (juvenile)	De Brauwer et al. 2017
Labridae	Labrichthys unilineatus	New-Solomon island
Labridae	Labrichthys unilineatus (juvenile)	De Brauwer et al. 2017
Labridae	Labroides dimidiatus	De Brauwer et al. 2017
Labridae	Macropharyngodon meleagris	New-Solomon island
Labridae	Macropharyngodon meleagris (juvenile)	De Brauwer et al. 2017
Labridae	Novaculichthys taeniourus	New-Solomon island
Labridae	Oxycheilinus digramma	New-Solomon island
Labridae	Pseudocoris heteroptera	New-Solomon island
Labridae	Pteragogus cryptus	New-Solomon island
Labridae	Stethojulis bandanensis	New-Solomon island
Labridae	Stethojulis interrupta	New-Solomon island
Labridae	Stethojulis strigiventer	New-Solomon island
Labridae	Stethojulis trilineata	New-Solomon island
Labridae	Thalassoma amblycephalum	New-Solomon island
Labridae	Thalassoma hardwicke	New-Solomon island
Labridae	Thalassoma lunare	New-Solomon island
Labridae	Wetmorella nigropinnata	New-Solomon island
Lethrinidae	Gnathodentex aureolineatus	De Brauwer et al. 2017
Lethrinidae	Lethrinus erythropterus	De Brauwer et al. 2017
Lethrinidae	Lethrinus harak	New-Solomon island
Lethrinidae	Lethrinus obsoletus	New-Solomon island
Lutjanidae	Lutjanus biguttatus	New-Solomon island
Lutjanidae	Lutjanus bohar	New-Solomon island
Lutjanidae	Lutjanus fulvus	De Brauwer et al. 2017
Lutjanidae	Lutjanus gibbus	New-Solomon island
Lutjanidae	Lutjanus rivulatus	New-Solomon island
Lutjanidae	Lutjanus russellii	New-Solomon island
Lutjanidae	Macolor macularis	De Brauwer et al. 2017
Lutjanidae	Ocyurus chrysurus	Thurman pers obs
Melanonidae	Melanonus zugmayeri	New-Solomon island
Microdesmidae	Nemateleotris magnifica (juvenile)	De Brauwer et al. 2017
Microdesmidae	Ptereleotris microlepis	De Brauwer et al. 2017
Monacanthidae	Aluterus scriptus	De Brauwer et al. 2017
Monacanthidae	Chaetodermis penicilligerus	Sparks obs.
Monacanthidae	Pervagor janthinosoma	New-Solomon island
Monacanthidae	Pseudalutarius nasicornis	De Brauwer et al. 2017
Moringuidae	Moringua javanica	New-Solomon island
Moringuidae	Moringua macrochir	New-Solomon island
Moringuidae	Moringua microchir	New-Solomon island
Mullidae	Parupeneus barberinus	De Brauwer et al. 2017
Mullidae	Parupeneus trifasciatus	New-Solomon island
Muraenidae	Anarchias seychellensis	New-Solomon island
Muraenidae	Enchelycore bayeri	New-Solomon island
Muraenidae	Gymnothorax breedeni	De Brauwer et al. 2017
Muraenidae	Gymnothorax buroensis	New-Solomon island
Muraenidae	Gymnothorax enigmaticus	De Brauwer et al. 2017
Muraenidae	Gymnothorax fuscomaculatus	New-Solomon island
Muraenidae	Gymnothorax herrei	New-Solomon island
Muraenidae	Gymnothorax javanicus	New-Solomon island
Muraenidae	Gymnothorax margaritophorus	New-Solomon island
Muraenidae	Gymnothorax melatremus	New-Solomon island
Muraenidae	Gymnothorax thyrsoidea	New-Solomon island
Muraenidae	Gymnothorax vicinus	Sparks obs.
Muraenidae	Strophidon brummeri	New-Solomon island
Muraenidae	Uropterygius fuscoguttatus	New-Solomon island
Muraenidae	Uropterygius nagoensis	New-Solomon island
Muraenidae	Uropterygius xanthopterus	New-Solomon island
Myctophidae	Benthosema fibulatum	New-Solomon island
Myctophidae	Bolinichthys longipes	New-Solomon island
Myctophidae	Bolinichthys supralateralis	New-Solomon island
Myctophidae	Ceratoscopelus warmingii	New-Solomon island
Myctophidae	Diaphus antonbruuni	New-Solomon island
Myctophidae	Diaphus diadematus	New-Solomon island
Myctophidae	Diaphus fulgens	New-Solomon island
Myctophidae	Diaphus garmani	New-Solomon island
Myctophidae	Diaphus jenseni	New-Solomon island
Myctophidae	Diaphus lucidus	New-Solomon island
Myctophidae	Diaphus luetkeni	New-Solomon island
Myctophidae	Diaphus malayanus	New-Solomon island
Myctophidae	Diaphus parri	New-Solomon island
Myctophidae	Diaphus signatus	New-Solomon island
Myctophidae	Diaphus splendidus	New-Solomon island
Myctophidae	Diaphus thiollierei	New-Solomon island
Myctophidae	Hygophum proximum	New-Solomon island
Myctophidae	Lampadena luminosa	New-Solomon island
Myctophidae	Lampanyctus nobilis	New-Solomon island
Myctophidae	Lampanyctus photonotus	New-Solomon island
Myctophidae	Lampanyctus tenuiformis	New-Solomon island
Myctophidae	Lampanyctus turneri	New-Solomon island
Myctophidae	Myctophum asperum	New-Solomon island
Myctophidae	Myctophum nitidulum	New-Solomon island
Myctophidae	Myctophum spinosum	New-Solomon island
Myctophidae	Symbolophorus evermanni	New-Solomon island
Myctophidae	Taaningichthys bathyphilus	New-Solomon island
Nemipteridae	Scolopsis lineatus	New-Solomon island
Neoscopelidae	Scopelengys tristis	New-Solomon island
Oneirodidae	Chaenophryne melanorhabdus	New-Solomon island
Ophichthidae	Leiuranus semicinctus	New-Solomon island
Ophichthidae	Leiuranus versicolor	New-Solomon island
Ophichthidae	Schultzidia johnstonensis	New-Solomon island
Ophichthidae	Schultzidia retropinnis	New-Solomon island
Ophidiidae	Brotula multibarbata	New-Solomon island
Ostraciidae	Ostracion cubicus	De Brauwer et al. 2017
Pempheridae	Pempheris oualensis	New-Solomon island
Pholidae	Apodichthys flavidus	Cohen per obs
Pholidae	Pholis laeta	Cohen per obs
Pholidae	Pholis ornata	Cohen per obs
Phosichthyidae	Pollichthys mauli	New-Solomon island
Phosichthyidae	Vinciguerria nimbaria	New-Solomon island
Platycephalidae	Cociella punctata	New-Solomon island
Platycephalidae	Cymbacephalus nematophthalmus	New-Solomon island
Platycephalidae	Sunagocia arenicola	New-Solomon island
Plesiopidae	Plesiops coeruleolineatus	New-Solomon island
Plesiopidae	Plesiops verecundus	New-Solomon island
Pleuronectidae	Pseudopleuronectes americanus	Sparks obs.
Plotosidae	Plotosus lineatus	De Brauwer et al. 2017
Pomacanthidae	Apolemichthys trimaculatus	De Brauwer et al. 2017
Pomacanthidae	Centropyge aurantia	New-Solomon island
Pomacanthidae	Centropyge bispinosus	New-Solomon island
Pomacanthidae	Centropyge colini	De Brauwer et al. 2017
Pomacanthidae	Centropyge joculator (juvenile)	De Brauwer et al. 2017
Pomacanthidae	Centropyge nox	New-Solomon island
Pomacanthidae	Paracentropyge multifasciata	De Brauwer et al. 2017
Pomacanthidae	Pomacanthus imperator	De Brauwer et al. 2017
Pomacanthidae	Pygoplites diacanthus	De Brauwer et al. 2017
Pomacentridae	Abudefduf lorenzi	New-Solomon island
Pomacentridae	Abudefduf saxatilis	Thurman pers obs
Pomacentridae	Abudefduf sexfasciatus	New-Solomon island
Pomacentridae	Abudefduf vaigiensis	De Brauwer et al. 2017
Pomacentridae	Acanthochromis polyacanthus	New-Solomon island
Pomacentridae	Amblyglyphidodon aureus	New-Solomon island
Pomacentridae	Amblyglyphidodon curacao	De Brauwer et al. 2017
Pomacentridae	Amblyglyphidodon leucogaster	New-Solomon island
Pomacentridae	Amphiprion chrysopterus	New-Solomon island
Pomacentridae	Amphiprion ocellaris	De Brauwer et al. 2017
Pomacentridae	Amphiprion perideraion	De Brauwer et al. 2017
Pomacentridae	Amphiprion polymnus	De Brauwer et al. 2017
Pomacentridae	Amphiprion sandaracinos	De Brauwer et al. 2017
Pomacentridae	Chromis alpha	New-Solomon island
Pomacentridae	Chromis amboinensis	New-Solomon island
Pomacentridae	Chromis atripectoralis	New-Solomon island
Pomacentridae	Chromis atripes	New-Solomon island
Pomacentridae	Chromis delta	New-Solomon island
Pomacentridae	Chromis elerae	New-Solomon island
Pomacentridae	Chromis lineata	New-Solomon island
Pomacentridae	Chromis margaritifer	De Brauwer et al. 2017
Pomacentridae	Chromis nigrura	De Brauwer et al. 2017
Pomacentridae	Chromis retrofasciata	New-Solomon island
Pomacentridae	Chromis scotochiloptera	New-Solomon island
Pomacentridae	Chromis ternatensis	New-Solomon island
Pomacentridae	Chromis xanthochira	New-Solomon island
Pomacentridae	Chromis xanthura	New-Solomon island
Pomacentridae	Chrysiptera biocellata	De Brauwer et al. 2017
Pomacentridae	Chrysiptera brownriggii	New-Solomon island
Pomacentridae	Chrysiptera cyanea	New-Solomon island
Pomacentridae	Chrysiptera glauca	De Brauwer et al. 2017
Pomacentridae	Chrysiptera rollandi	New-Solomon island
Pomacentridae	Chrysiptera talboti	New-Solomon island
Pomacentridae	Chrysiptera unimaculata	New-Solomon island
Pomacentridae	Dascyllus aruanus	De Brauwer et al. 2017
Pomacentridae	Dascyllus melanurus	New-Solomon island
Pomacentridae	Dascyllus reticulatus	De Brauwer et al. 2017
Pomacentridae	Dascyllus trimaculatus	De Brauwer et al. 2017
Pomacentridae	Dischistodus chrysopoecilus	New-Solomon island
Pomacentridae	Dischistodus melanotus	New-Solomon island
Pomacentridae	Dischistodus perspicillatus	New-Solomon island
Pomacentridae	Hemiglyphidodon plagiometopon	New-Solomon island
Pomacentridae	Neoglyphidodon nigroris	New-Solomon island
Pomacentridae	Plectroglyphidodon dickii	New-Solomon island
Pomacentridae	Plectroglyphidodon lacrymatus	De Brauwer et al. 2017
Pomacentridae	Plectroglyphidodon leucozonus	New-Solomon island
Pomacentridae	Pomacentrus adelus	New-Solomon island
Pomacentridae	Pomacentrus albimaculus	New-Solomon island
Pomacentridae	Pomacentrus bankanensis	New-Solomon island
Pomacentridae	Pomacentrus brachialis	New-Solomon island
Pomacentridae	Pomacentrus chrysurus	New-Solomon island
Pomacentridae	Pomacentrus nigromanus	New-Solomon island
Pomacentridae	Pomacentrus nigromarginatus	New-Solomon island
Pomacentridae	Pomacentrus pavo	De Brauwer et al. 2017
Pomacentridae	Pomacentrus philippinus	New-Solomon island
Pomacentridae	Pomacentrus reidi	New-Solomon island
Pomacentridae	Pomacentrus tripunctatus	New-Solomon island
Pomacentridae	Pomacentrus vaiuli	New-Solomon island
Pomacentridae	Stegastes albifasciatus	De Brauwer et al. 2017
Pomacentridae	Stegastes fasciolatus	New-Solomon island
Pomacentridae	Stegastes insularis	De Brauwer et al. 2017
Pomacentridae	Stegastes nigricans	New-Solomon island
Priacanthidae	Priacanthus sagittarius	New-Solomon island
Pseudochromidae	Cypho purpurascens	New-Solomon island
Pseudochromidae	Pictichromis paccagnellae	New-Solomon island
Pseudochromidae	Pseudochromis fuscus	New-Solomon island
Pseudochromidae	Pseudochromis tapeinosoma	New-Solomon island
Psychrolutidae	Psychrolutes sigalutes	Cohen per obs
Ptilichthyidae	Ptilichthys goodei	Cohen per obs
Rajidae	Leucoraja ocellata	Sparks obs.
Rhamphocottidae	Rhamphocottus richardsonii	Cohen per obs
Scaridae	Chlorurus microrhinos	De Brauwer et al. 2017
Scaridae	Hipposcarus longiceps	De Brauwer et al. 2017
Scaridae	Scarus schlegeli	De Brauwer et al. 2017
Scorpaenidae	Caracanthus unipinna	New-Solomon island
Scorpaenidae	Dendrochirus biocellatus	De Brauwer et al. 2017
Scorpaenidae	Scorpaenodes albaiensis	New-Solomon island
Scorpaenidae	Scorpaenodes minor	New-Solomon island
Scorpaenidae	Scorpaenopsis ramaraoi	New-Solomon island
Sebastidae	Sebastes mystinus	Sparks obs.
Serranidae	Aporops bilinearis	New-Solomon island
Serranidae	Belonoperca chabanaudi	De Brauwer et al. 2017
Serranidae	Cephalopholis argus	De Brauwer et al. 2017
Serranidae	Cephalopholis cyanostigma	De Brauwer et al. 2017
Serranidae	Cephalopholis microprion	New-Solomon island
Serranidae	Cephalopholis sexmaculata	New-Solomon island
Serranidae	Cephalopholis sonnerati	De Brauwer et al. 2017
Serranidae	Cephalopholis urodeta	New-Solomon island
Serranidae	Epinephelus coeruleopunctatus	New-Solomon island
Serranidae	Epinephelus corallicola	New-Solomon island
Serranidae	Epinephelus fasciatus	De Brauwer et al. 2017
Serranidae	Epinephelus fuscoguttatus	De Brauwer et al. 2017
Serranidae	Epinephelus melanostigma	New-Solomon island
Serranidae	Epinephelus merra	De Brauwer et al. 2017
Serranidae	Epinephelus ongus	New-Solomon island
Serranidae	Epinephelus polyphekadion	New-Solomon island
Serranidae	Epinephelus spilotoceps	De Brauwer et al. 2017
Serranidae	Grammistes sexlineatus	New-Solomon island
Serranidae	Grammistops ocellatus	New-Solomon island
Serranidae	Liopropoma susumi	New-Solomon island
Serranidae	Plectranthias longimanus	New-Solomon island
Serrivomeridae	Serrivomer jesperseni	New-Solomon island
Siganidae	Siganus doliatus	New-Solomon island
Siganidae	Siganus fuscescens	New-Solomon island
Siganidae	Siganus sp.	De Brauwer et al. 2017
Soleidae	Brachirus heterolepis	New-Solomon island
Sphyraenidae	Sphyraena sp.	De Brauwer et al. 2017
Spratelloididae	pratelloides delicatulus	New-Solomon island
Sternoptychidae	Argyropelecus aculeatus	New-Solomon island
Sternoptychidae	Argyropelecus hemigymnus	New-Solomon island
Sternoptychidae	Argyropelecus lychnus	New-Solomon island
Sternoptychidae	Argyropelecus sladeni	New-Solomon island
Sternoptychidae	Sternoptyx diaphana	New-Solomon island
Stichaeidae	Xiphister atropurpureus	Cohen per obs
Stichaeidae	Xiphister mucosis	Cohen per obs
Stomiidae	Astronesthes indicus	New-Solomon island
Stomiidae	Chauliodus macouni	New-Solomon island
Stomiidae	Chauliodus sloani	New-Solomon island
Stomiidae	Malacosteus niger	New-Solomon island
Sygnathidae	Bhanotia fasciolata	New-Solomon island
Sygnathidae	Choeroichthys brachysoma	New-Solomon island
Sygnathidae	Choeroichthys cinctus	New-Solomon island
Sygnathidae	Phoxocampus diacanthus	New-Solomon island
Sygnathidae	Phoxocampus tetrophthalmus	New-Solomon island
Synanceiidae	Synanceia alula	New-Solomon island
Tetraodontidae	Arothron caeruleopunctatus	De Brauwer et al. 2017
Tetraodontidae	Arothron manilensis	De Brauwer et al. 2017
Tetraodontidae	Arothron nigropunctatus	De Brauwer et al. 2017
Tetraodontidae	Canthigaster compressa	De Brauwer et al. 2017
Tetraodontidae	Canthigaster janthinopterus	New-Solomon island
Tetraodontidae	Canthigaster papua	New-Solomon island
Tetraodontidae	Canthigaster valentini	De Brauwer et al. 2017
Toxotidae	Toxotes jaculatrix	New-Solomon island
Triakidae	Triakis semifasciata	Sparks obs.
Tripterygiidae	Enneapterygius hemimelas	New-Solomon island
Xenisthmidae	Tyson belos	New-Solomon island
Zanclidae	Zanclus cornutus	De Brauwer et al. 2017
Zoarcidae	Lycodes pacificus	Cohen per obs
