# Supplementary material for: Illuminating the Past: Coral Reefs Facilitate Diversification of Biofluorescence in Ray-finned Fishes
Source: Research Square preprint supplement (doi:10.21203/rs.3.rs-4513221/v1), 2024-07-19
Supplement: Supplementary file 2 [file Supplementary 10.pdf › SupplementaryFiles/Supplementary 10.pdf]

**A**

Cumulated Number of  
Biofluorescent Families

60  
40  
20

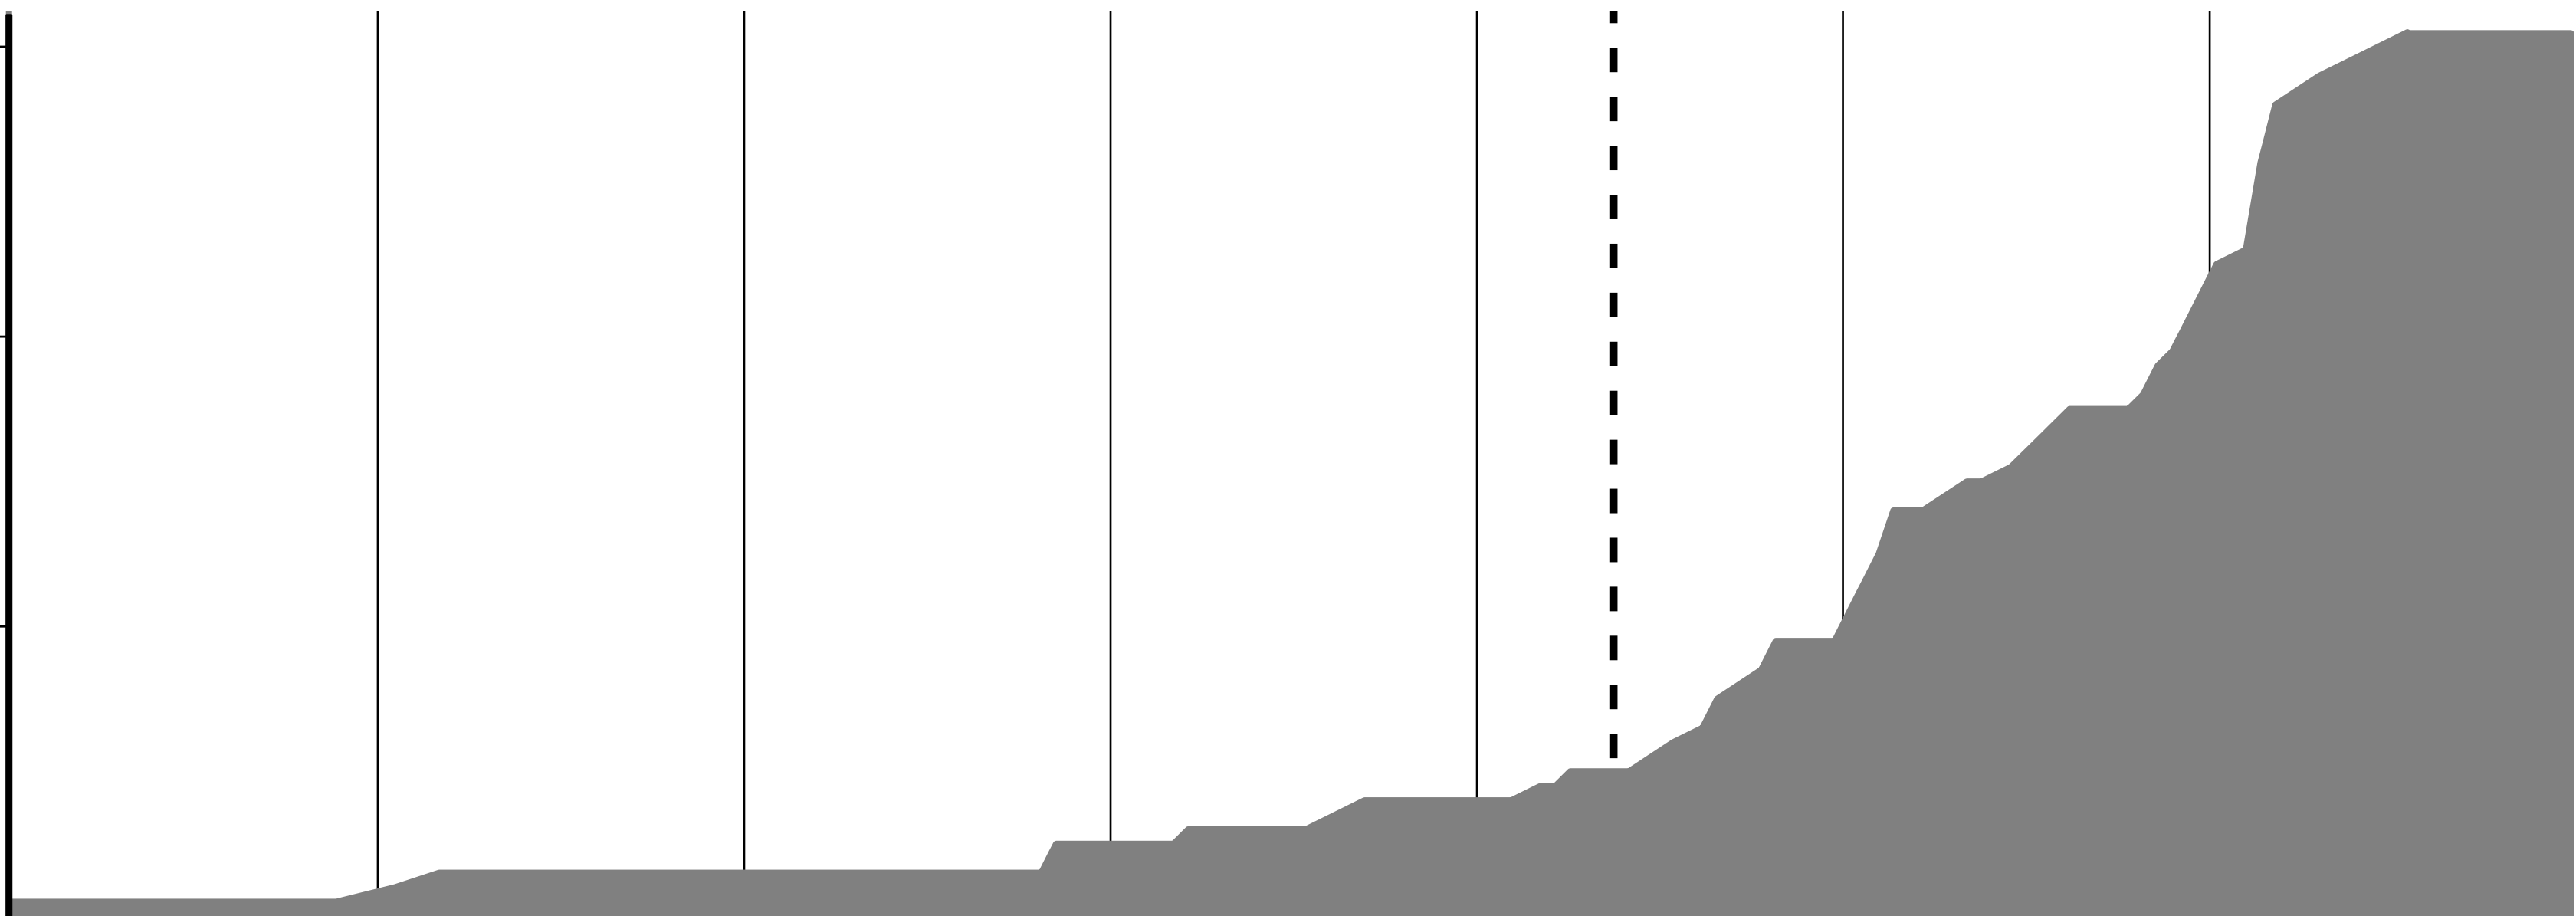**B**

Cumulated Number of Species  
in Families with Biofluorescent  
Representatives

10000  
5000

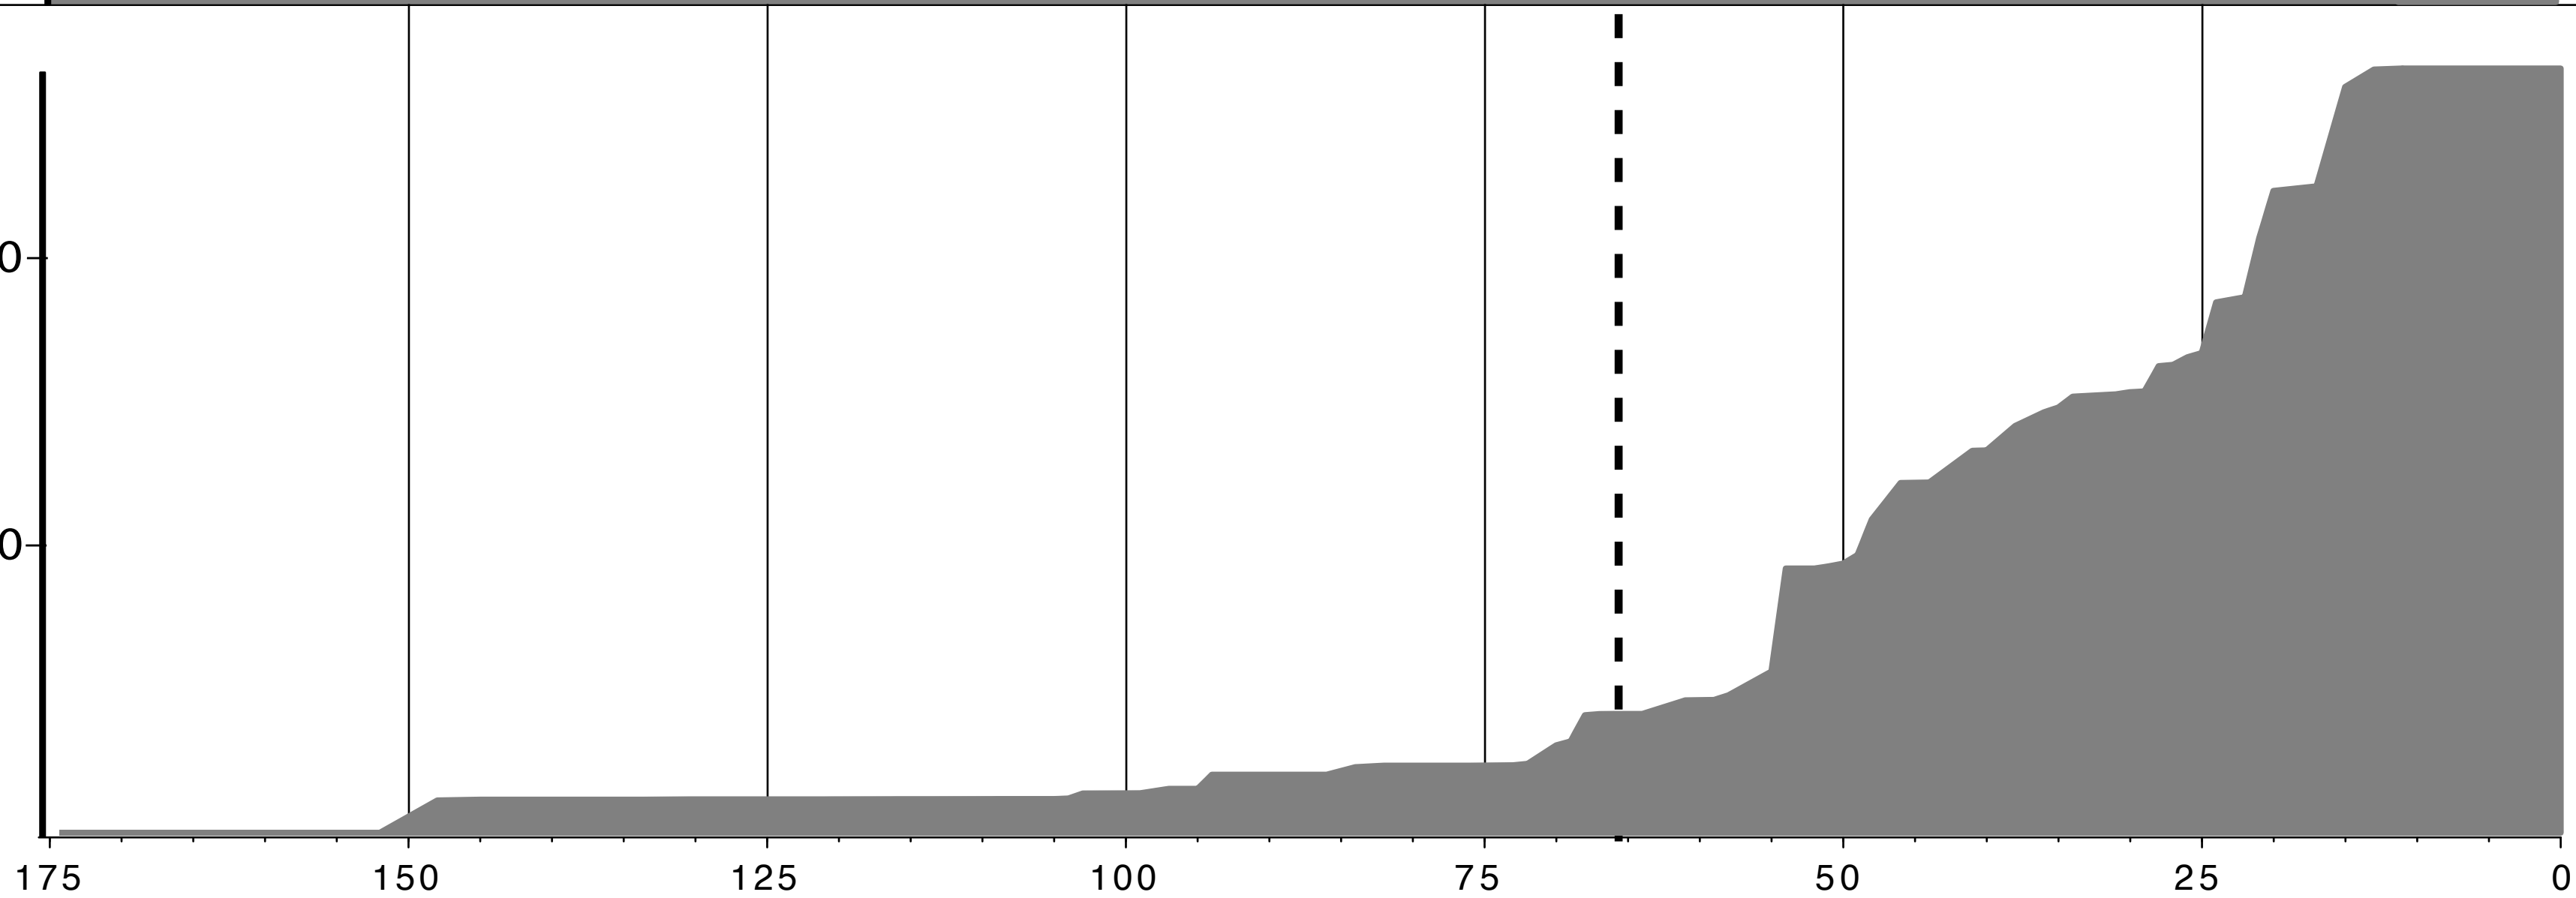

Time (million years)
