# Supplementary material for: Illuminating the Past: Coral Reefs Facilitate Diversification of Biofluorescence in Ray-finned Fishes
Source: Research Square preprint supplement (doi:10.21203/rs.3.rs-4513221/v1), 2024-07-19
Supplement: Supplementary file 5 [file Supplementary 2.xlsx]

## Sheet: Sheet1
Order	Family	Species	Red	Green	Red and Green	Location	N	Citation	Notes
Perciformes	Liparidae	Liparis florae	1	1	1	Friday Harbor, WA	1	Cohen pers obs	soft marbled fluoro all around the face with lime green eyes. soft orange glow along the tail
Pleuronectiformes	Paralichthyidae	Citharichthys stigmaeus	1			Friday Harbor, WA	1	Cohen pers obs	bright oragne speckles all over the body. Seen in the jouveniles that we have caught, yet to catch an adult
Perciformes	Stichaeidae	Chirolophis nugator	1			Friday Harbor, WA	1	Cohen pers obs	the cirri on top of its head have a soft red orange glow as do the stripes along the body tail and spot on the dorsal fin
Perciformes	Stichaeidae	Lumpenus sagitta		1		Friday Harbor, WA	1	Cohen pers obs	the spines are a bright green glow
Pleuronectiformes	Pleuronectidae	Lyopsetta exilis		1		Friday Harbor, WA	1	Cohen pers obs	green spots over the body, these correlate with the white patches. dull green glow where there is white marbeling.
Scorpaeniformes	Cottidae	Enophyrs bison		1		Friday Harbor, WA	1	Cohen pers obs	bright green fluoro around the eyes potentiall soft green fluoro on the white stripes but hard to see as we onky have very small jouveniles
Scorpaeniformes	Cottidae	Icelinus borealis		1		Friday Harbor, WA	1	Cohen pers obs	soft green glow on the preopercle spines
Scorpaeniformes	Hexagrammidae	Hexagrammus decagrammus		1		Friday Harbor, WA	1	Cohen pers obs	green fluor around eyes
Scorpaeniformes	Psychrolutidae	Dasycottus setiger		1		Friday Harbor, WA	1	Cohen pers obs	lime green around the eyes
Lophiiformes	Antennariidae	Antennarius rosaceus	1	1		Solomon Islands	1	New- Solomon island
Perciformes	Gobiidae	Eviota spilota	1			Solomon Islands	2	New- Solomon island
Perciformes	Gobiidae	Sueviota lachneri	1			Solomon Islands	1	New- Solomon island
Perciformes	Labridae	Cirrhilabrus punctatus	1			Solomon Islands	1	New- Solomon island
Perciformes	Tripterygiidae	Enneapterygius niger	1			Solomon Islands	2	New- Solomon island
Perciformes	Tripterygiidae	Helcogramma capidata	1			Solomon Islands	2	New- Solomon island
Perciformes	Tripterygiidae	Helcogramma desa	1			Solomon Islands	2	New- Solomon island	Very bright red- good for Recolorize
Scorpaeniformes	Scorpaenidae	Sebastapistes fowleri	1			Solomon Islands	2	New- Solomon island
Perciformes	Blenniidae	Ecsenius axelrodi	1	1		Solomon Islands	1	New- Solomon island
Perciformes	Gobiidae	Callogobius clitellus		1		Solomon Islands	1	New- Solomon island	Very light general green
Perciformes	Gobiidae	Gnatholepsis anjerensis		1		Solomon Islands	1	New- Solomon island
Perciformes	Gobiidae	Trimma annosum		1		Solomon Islands	2	New- Solomon island
Perciformes	Gobiidae	Trimma cheni		1		Solomon Islands	1	New- Solomon island
Perciformes	Labridae	Cheilinus oxycephalus		1		Solomon Islands	1	New- Solomon island
Perciformes	Scorpaenidae	Caracanthus maculatus		1		Solomon Islands	1	New- Solomon island
Perciformes	Labridae	Cirrhilabrus beauperryi	1			Solomon Islands	1	Sparks obs.
Perciformes	Apogonidae	Apogon crassiceps		1		Solomon Islands	1	Sparks obs.
Perciformes	Apogonidae	Ostorhinchus nigrofasciatus		1		Solomon Islands	1	Sparks obs.
Tetraodontiformes	Balistidae	Balistapus undulatus		1		Solomon Islands	1	Sparks obs.	faint green
Albuliformes	Albulidae	Albula goreensis		1		Stuart, FL	25	Thurman et al. In Review	Intense green fluorescence on iris, lower jaw, scaleless axil of the pectoral fins, the axil of the pelvic fins, and the vent. Duller green on rest of head/body.
Albuliformes	Albulidae	Albula vulpes		1		Long Key, FL	25	Thurman et al. in Review	Intense green fluorescence on iris and when present small portions of scaleless axil of the pectoral fins. Duller green on rest of head/body.
Perciformes	Gerreidae	Diapterus auratus	1	1	1	Fort Pierce, FL	1	Thurman obs.	Red fluorescence on tips of pectroal fins and vent. Duller green onhead/body, with first two dorsal spines being brighter.
Perciformes	Gerreidae	Eucinostomus gula	1	1	1	Fort Pierce, FL	1	Thurman obs.	Light red fluorecent speckling on anterior ventral body and head. Green fluorescence on the rest of the body/head.
Pleuronectiformes	Achiridae	Trinectes maculatus	1	1	1	Fort Pierce, FL	1	Thurman obs.	Green fluorescence on whole fish, including the eyes. Red fluorescence inbetween fin rays and may be associated with mucus.
Acanthuriformes	Sciaenidae	Sciaenidae sp.		1		Fort Pierce, FL	1	Thurman obs.	Dull green fluorescence on ventral side of body/head and the fins, particularly the pectoral fins. Juvenile.
Beloniformes	Belonidae	Strongylura sp.		1		Fort Pierce, FL	1	Thurman obs.	Dull green on whole body/head; slighlty brighter towards the ventral side.
Characiformes	Serrasalmidae	Metynnis argenteus		1		Aqurium	1	Thurman obs.	Green fluorescence on whole fish.
Cichliformes	Cichlidae	Andinoacara pulcher		1		Aqurium	1	Thurman obs.	Green fluorescence on whole fish, including the lens. Brighter on ventral side, with melanophore patterns reducing fluorescence.
Cichliformes	Cichlidae	Astronotus ocellatus		1		Aqurium	2	Thurman obs.	Dull green fluorescence on whole fish, including the lens
Elopiformes	Elopidae	Elops saurus		1		Fort Pierce, FL	4	Thurman obs.	Green fluorescnece on head and body except for dorsal part of the head/body. An intense horizontal stripe of green fluorescence is found on the dorsolateral part of the body. Fluorescence on body is found on the scales.
Istiophoriformes	Sphyraenidae	Sphyraena barracuda		1		Fort Pierce, FL	1	Thurman obs.	Green fluorescence on the ventral part of the body/head as well as the teeth.
Osteoglossiformes	Pantodontidae	Pantodon buchholzi		1		Aqurium	1	Thurman obs.	Green fluorescence on whole fish, with a bright spot on lower jaw and on the ventral margin of the operculum.
Perciformes	Centropomidae	Centropomus undecimalis		1		Fort Pierce, FL	1	Thurman obs.	Green fluorescence on upper and lower jaw, preoperculum, branchiostegal rays, and base of the pelvic fins. Dull fluorescence on ventral body.
Perciformes	Gerreidae	Eucinostomus sp.		1		Fort Pierce, FL	1	Thurman obs.	Could not identify to species level, but different from other mojarras. Dull green fluorescence on body/head.
Perciformes	Gerreidae	Gerres cinereus		1		Fort Pierce, FL	1	Thurman obs.	Brighter green fluorescence on ventral part of body/head. Duller green on rest of head/body.
Perciformes	Lutjanidae	Lutjanus griseus		1		Fort Pierce, FL	1	Thurman obs.	Dull green fluorescence on body, with brighter areas on all fin spines, teeth, and preoperculum.
Perciformes	Pomacentridae	Chrysiptera hemicyanea		1		Aqurium	1	Thurman obs.	Dull green fluorescence primarily associated with yellow coloration.
Pleuronectiformes	Paralichthyidae	Paralichthys sp.		1		Fort Pierce, FL	1	Thurman obs.	Green fluorescence on whole fish, left and right side.
Siluriformes	Loricariidae	Hypostomus plecostomus		1		Aqurium	1	Thurman obs.	Both armor and skin exhibit green fluorescence. Some red fluorescent algae found on armor and teeth.
Tetraodontiformes	Tetraodontidae	Sphoeroides testudineus		1		Fort Pierce, FL	1	Thurman obs.	Weak fluorescence on head/body except for melanophore spots.
