# Supplementary material for: Illuminating the Past: Coral Reefs Facilitate Diversification of Biofluorescence in Ray-finned Fishes
Source: Research Square preprint supplement (doi:10.21203/rs.3.rs-4513221/v1), 2024-07-19
Supplement: Supplementary file 8 [file Supplementary 3.xlsx]

## Sheet: Sheet1
Genus_sp	COI	Glyt	myh6	plagl2	rag1	zic1	cytb
Abalistes_stellatus	JF492756	JX190373	JX190512	JX190636	JX190901	JX191354	NA
Acanthurus_nigricans	EF648267	JX190353	JX190496	JX190621	JX190886	JX191342	KM456941.1
Aeoliscus_strigatus	AP006782.1	NA	JX189647	NA	JX189801	JX189030	AY786434.1
Albula_vulpes	GU225131	NA	JX190390	NA	JX190803	JX191247	AF311771.1
Aldrovandia_affinis	AP002974.1	NA	JX190392	JX190533	KF681926.1	JX191249	NC_005801.1
Alepisaurus_ferox	EU366542	JX190305	JX190451	JX190577	JX190840	JX191299	NC_067732.1
Ambloplites_rupestris	EU524413	JX188709	JQ352815	JQ352860	JF742888	JQ353127	AY225663.1
Ameiurus_natalis	EU524425	JX190273	JX190416	JX190561	JX190818	NA	AF484158.1
Amia_calva	AB042952	JX190245	JX190389	JX190531	JX190802	JX191246	NC_004742.1
Amphiprion_ocellaris	OQ386809.1	NA	NA	KC828007.1	AY208631.1	NA	NC_009065.1
Anguilla_japonica	HQ339972.1	JX255650.1	JX255659.1	JX255556.1	NA	JX255602.1	NC_002707.2
Anguilla_rostrata	EU524441	JX190248	JX190395	NA	NA	JX191252	AB021767.1
Antennarius_striatus	GU188497	FJ582791	JX190505	JX190629	JX190896	JX191349	NA
Aphredoderus_sayanus	JN024806	JX190317	JX190462	JX190586	JX190850	JX191311	NC_004372.1
Aplochiton_taeniatus	HQ540333.1	JX190292	JX190435	NA	NA	NA	HQ540347.1
Aplodinotus_grunniens	EU523923	JX188754	JX189695	JX189381	JX189853	JX189079	AY225662.1
Aracana_aurita	JQ861007	JX190372	JX190511	JX190635	JX190900	JX191353	KF027542.1
Archoplites_interruptus	JN024809	JX190346	JQ352816	JQ352861	JF742889	JQ353128	AY225665.1
Argentina_silus	AP012952.1	JX190279	JX190423	NA	JX190822	JX191275	MT410932.1
Argyropelecus_gigas	EU148084	NA	JX190448	JX190574	JX190837	JX191296	NA
Arrhamphus_sclerolepis	KP296162.1	NA	JX189640	JX189324	KY198688.1	JX189025	AY693511.1
Assurger_anzac	JN990845	JX190381	JX190521	JX190644	JX190910	JX191364	NC_022494.1
Astyanax_mexicanus	HQ557152	JX190268	JX190411	JX190556	FJ439501.1	NA	FJ439346.1
Ateleopus_japonicus	AP002916	JX190303	JX190449	JX190575	JX190838	JX191297	NC_003178.1
Aulostomus_maculatus	JQ842017	JX188694	JX189646	JX189329	JX189800	JX189029	AF327456.1
Barbourisia_rufa	JQ354000	JX190324	JX190468	JX190591	JX190855	JX191314	NC_012046.1
Bathylaco_nigricans	AP009494	JX190277	JX190421	NA	NA	NA	NA
Bathylagus_euryops	KC442065.1	JX190280	JX190424	NA	JN230895.1	JX191276	NA
Bathypterois_atricolor	MF956490.1	JX190307	JX190453	JX190579	JX190842	JX191300	NA
Bathysaurus_ferox	EU366547	KX227816.1	KX227854.1	EU366643	EU366689	EU366734	AP004204.1
Benthosema_glaciale	KF768167	KX227817.1	KJ555840.1	NA	KF768155	KF768160	JX133774.1
Beryx_decadactylus	AP004430.1	JX188692	JX189644	JX189327	JX189798	KF140499.1	DQ197929.1
Betta_splendens	JQ667506	JX188827	JX189768	KR131456.1	JX189928	JX189154	KR527219.1
Bothus_lunatus	JQ842025	JX190361	JX190501	NA	JX190891	NA	NA
Brotula_multibarbata	JQ431501	JX188680	JX189630	JX189315	JX189782	JX189013	NA
Callionymus_bairdi	JQ840435	JX190380	JX190518	JX190642	JX190908	JX191361	KF265076.1
Cantherhines_pullus	JQ841489	JX190377	JX190515	NA	JX190904	JX191357	KF025770.1
Caranx_crysos	GU702378	JX190345	JX190490	JX190615	JX190879	JX191336	NC_057648.1
Cataetyx_lepidogenys	ON398540.1	JX190337	JX190481	JX190604	JX190868	JX191326	NA
Centroberyx_druzhinini	HQ945941	JX190329	JX190473	JX190596	JX190860	JX191319	NA
Centropomus_undecimalis	JQ365276	JX188711	JX189662	JX189344	JX189816	JX189045	AF240739.1
Centropyge_flavissima	JQ431559	NA	EF536288.1	EF536250.1	EF530089	EF533911.1	KP973960.1
Cephalopholis_argus	JX674947	JX188757	JX189698	JX189384	JX189856	JX189082	NC_022142.1
Chaetodon_striatus	JQ840451	JX190349	JX190492	JX190617	JX190882	JX191338	FJ167704.1
Chanos_chanos	HQ654700	JX190263	JX190408	JX190551	JX190809	JX191264	NC_004693.1
Chaunax_suttkusi	NA	JX190368	JX190507	JX190631	JX190898	JX191351	HM049939.1
Chelmon_rostratus	FJ583134	JX190350	JX190493	JX190618	JX190883	JX191339	NC_025953.1
Chilomycterus_schoepfii	JQ842420	JX188832	JX189773	JX189454	JX189933	JX189158	JQ681852.1
Chitala_chitala	FJ918897	JX190259	JX190405	JX190546	FJ896406	JX191260	ON764424.1
Chlorophthalmus_agassizi	EU366553	KM983058.1	FJ918879.1	KM983077.1	EU366695	EU366740	NC_003160.1
Chologaster_cornuta	HQ557553	JX190318	HQ729508	HQ729624	HQ707706	HQ729595	NA
Chromis_cyanea	JQ840457	JX188795	NA	JX189416	JX189896	JX189123	MW630991.1
Cirrhitichthys_falco	FJ583255	NA	JQ352824	JQ352869	KF017129.1	JQ353136	NA
Conger_oceanicus	HM389435.1	JX190249	JX190396	JX190537	NA	JX191253	NA
Coregonus_clupeaformis	EU523959	JX190297	JX190441	JX190568	JX190831	JX191289	NC_020762.1
Coryphaena_hippurus	JQ839745	JX190342	JX190488	JX190612	JX190876	JX191333	DQ197936.1
Coryphaenoides_rupestris	KY033894.1	EU002054	EU001915	KY873892.1	FJ215233	NA	AJ517502.1
Cottus_carolinae	JN025051	JX188700	JX189652	JX189334	JX189806	JX189035	AF549113.1
Cromeria_nilotica	AP011560.1	JX190265	JX190410	JX190553	JX190811	JX191266	NA
Cyttopsis_rosea	JQ774524	JX190321	JX190465	JX190588	JX190852	NA	NA
Denticeps_clupeoides	AP007276	NA	JX190407	JX190549	DQ912100	NA	NC_007889.1
Diaphus_dumerilii	KF768169	NA	FJ918883.1	MF991189.1	KF768156	KF768161	NA
Diodon_holocanthus	GU225199	JX188833	JX189774	JX189455	JX189934	JX189159	JQ681853.1
Diplophos_taenia	EU366584	KX227820.1	FJ918866	EU366676	EU366724	EU366768	NC_002647.1
Dissostichus_eleginoides	JN640627	JX188801	KJ721641.1	JX189422	JX189902	JN186821.1	AB723627.1
Echeneis_naucrates	JQ841117	JX190343	KX512747.1	JX190613	JX190877	JX191334	KF021242.1
Echidna_rhodochilus	AP019351.1	JX190251	JX190397	JX190538	JX190805	NA	NA
Elassoma_zonatum	JN025308	JX190386	JQ352848	JQ352893	JQ353047	JQ353156	NC_011388.1
Eleotris_pisonis	MG936909.1	JX188817	JX189758	JX189440	JX189918	JX189145	NA
Elops_saurus	AP004807	JX190247	JX190394	JX190535	FJ896408	JX191250	NC_005803.1
Enneapterygius_gruschkai	HQ168540	NA	NA	NA	HQ168770	KC831048.1	KT368783.1
Esox_lucius	EU524591	JX190284	JX190428	EU002099	JX190825	EU001870	KU659805.1
Etheostoma_atripinne	HQ557533	JX188739	NA	JX189366	JX189838	JX189065	AF288444.1
Eurypharynx_pelecanoides	AB046473	JX190254	JX190402	NA	KF681951.1	JX191255	AB046473.2
Facciolella_gilbertii	KF768170	NA	KX227859.1	KX227897.1	NA	KF768162	NA
Fibramia_lateralis	FJ346796.1	JX188705	JX189657	JX189339	JX189811	JX189040	NA
Fistularia_petimba	JQ365356	NA	JX190482	JX190607	JX190871	NA	NC_024190.1
Forcipiger_flavissimus	JF434972	JX188713	JX189664	JX189346	JX189818	JX189047	NC_063495.1
Galaxias_maculatus	AP004104	JX190294	JX190437	JN132596.1	N232643	JX191286	NC_004594.1
Galaxiella_nigrostriata	AP006853	JX190295	JX190438	NA	JN232647	JX191287	JN232600.1
Gambusia_affinis	JQ842475	JX188691	JX189643	JX189326	JX189797	JX189027	NC_004388.1
Gasterosteus_aculeatus	JQ354102	JX188696	JX189649	JX189331	JX189803	JX189032	AB094627.1
Gazza_minuta	DQ028007	JX188724	JX189671	JX189353	JX189825	JX189054	NC_026232.1
Gephyroberyx_darwinii	HQ945918	JX190334	JX190478	JX190601	JX190865	JX191324	NA
Gigantura_indica	EU366557	KX227823.1	KX227861.1	EU366652	EU366699	EU366744	AP004197.1
Gillellus_semicinctus	NA	NA	JX189751.1	JX189433.1	JX189913.1	JX189138.1	NA
Gnathonemus_petersii	HM880237	JX190258	NA	JX190545	JX190807	JX191259	NC_012717.2
Gobiesox_adustus	MN539512.1	OK206195.1	OK206410.1	NA	NA	KY686165.1	NA
Gonorynchus_greyi	AB054134	JX190264	JX190409	JX190552	JX190810	JX191265	NA
Gymnorhamphichthys_petiti	NA	JX190267	NA	JX190555	JX190813	JX191268	NA
Halichoeres_bivittatus	JQ840524	JX188785	JX189728	JX189410	JX189885	JX189111	MZ517136.1
Halieutichthys_aculeatus	MH378493.1	JX190370	JX190509	JX190633	NA	NA	NA
Halosauropsis_macrochir	EU869816	JX190246	JX190393	JX190534	FJ896410.1	KJ910157.1	NC_035885.1
Harpadon_microchir	EU366558	NA	NA	EU366653	EU366700	EU366745	NA
Helostoma_temminckii	AB861523.1	JX190384	JX190524	JX190647	JX190913	JX191366	AY763742.1
Heteroconger_hassi	JQ350055	JX190250	NA	NA	NA	JX191254	NC_013629.1
Heteromycteris_japonicus	ABFJ254	JX190365	JX190504	JX190628	JX190895	JX191348	NC_024921.1
Himantolophus_sagamius	GU440342	JX190369	JX190508	JX190632	JX190899	JX191352	DQ132494.1
Hime_japonica	AB047821	KX227825.1	KX227863.1	EU366641	EU366687	EU366732	KU315018.1
Hiodon_tergisus	EU524659	JX190257	JX190404	JX190544	NA	JX191258	NC_015082.1
Histiophryne_cryptacanthus	GU188513	JX190367	JX190506	JX190630	JX190897	JX191350	NA
Hoplostethus_atlanticus	JN580187	JX188693	JX189645	JX189328	JX189799	JX189028	JN580225.1
Hypoptychus_dybowskii	NC4400	JX190341	JX190487	JX190611	JX190875	JX191332	NC_004400.1
Ijimaia_loppei	NA	JX190304	JX190450	JX190576	JX190839	JX191298	NA
Ipnops_sp	EU366560	KX227827.1	KX227865.1	EU366655	EU366702	EU366747	AP004198.1
Kaupichthys_hyoproroides	JQ842910.1	NA	NA	NA	NA	NA	NC_013607.1
Kurtus_gulliveri	EU381031	JX190339	JX190485	JX190609	JX190873	JX191330	NC_022477.1
Labrisomus_multiporosus	KX230180.1	JX188812	JX189752	JX189434	JX189914	JX189139	NA
Lachnolaimus_maximus	JQ841240	JX188788	JX189732	JX189411	NA	JX189115	EU601404.1
Lagiacrusichthys_macropinna	EU366552.1	NA	NA	EU366648	EU366694	EU366739	NA
Lampris_guttatus	DQ885096	JX190314	FJ918885.1	JX190584	JX190848	JX191308	DQ197959.1
Lateolabrax_japonicus	MW166212.1	MH807850.1	GU368853.1	GU368835.1	MH807876.1	GU368704.1	MW166212.1
Lates_niloticus	GU324190	JX190382	JX190522	JX190645	JX190911	MW562623.1	AB117106.1
Leiognathus_equula	DQ028017	JX188725	JX189672	JX189354	JX189826	JX189055	EU380961.1
Lepidogalaxias_salamandroides	FJ918925	JN132527.1	JX190440	JX255549.1	FJ896438	JX191288	JN232586.1
Lepidogobius_lepidus	KF918879.1	NA	JX190519	JX190643	JX190909	JX191362	KF415602.1
Lepisosteus_oculatus	KX145427.1	NA	JN853393.1	NA	JN230873.1	JN853463.1	NC_004744.1
Lepomis_macrochirus	EU524741	JX190347	JX190491	JX190616	JX190880	JX191337	MW630939.1
Liopropoma_rubre	JQ841244	NA	HQ731360	HQ731341	HQ731318	HQ731189	NA
Liparis_mucosus	JQ354182	JX190387	JX190525	NA	JX190915	JX191368	DQ082907.1
Lophius_americanus	EU660715	JX188679	JX189629	JX189314	JX189781	JX189012	HE608212.2
Lota_lota	HQ961084	JX190320	JX190464	KY873894.1	JX190851	JX191313	KU316025.1
Luvarus_imperialis	AP009161	JX190355	EF536299	EF536261	EF530099	EF533922	NC_009851.1
Lycodes_terraenovae	MW908002.1	EF032996	EF032931	EF033022	NA	EF032918	AY158816.1
Maccullochella_peelii	DQ107940	JX188737	JQ352837	JQ352882	JQ353036	JQ353148	MN842722.1
Macropinna_microstoma	EU869816	JX190282	JX190426	NA	JX190823	JX191278	NA
Macroramphosus_scolopax	JQ775070	NA	JX190483	JX190608	JX190872	JX191329	NC_010265.1
Mallotus_villosus	HQ712650	JX190289	FJ918856	JN132583.1	DQ397097	FJ906654	HM106491.1
Masturus_lanceolatus	AP006239	JX190374	EF536316	EF536277	AY308792	EF533939	NC_005837.1
Megalops_atlanticus	AP004808	NA	NA	JX190536	AY430204	JX191251	NC_005804.1
Meiacanthus_grammistes	OQ387076.1	JX188809	JX189748	JX189430	JX189910	JX189135	MW630968.1
Melamphaes_polylepis	NA	JX190325	JX190469	JX190592	JX190856	JX191315	NA
Mene_maculata	GU805056	JX190352	JX190495	JX190620	JX190885	JX191341	NC_037220.1
Micropterus_salmoides	HQ557266	JX190348	JQ352819	JQ352864	JF742912	JQ353131	OK945939.1
Mola_mola	JX438518	JX190375	JX190513	JX190637	JX190902	JX191355	NC_005836.1
Monocentris_japonica	DQ648452	JX190332	JX190476	JX190599	JX190863	JX191322	NC_004392.1
Monopterus_albus	AP002945	JX188698	JQ352812	JQ352857	JQ353018	JQ353124	NC_003192.1
Monotaxis_grandoculis	JQ431907	JX188727	JX189673	JX189356	JX189828	JX189057	NC_010957.1
Morone_chrysops	EU524141	JX188732	JX189678	JX189361	JX189833	JX189061	AY770838.1
Mugil_cephalus	KY683176.1	JX188682.1	JQ352811.1	JQ352856.1	AF369065.1	JX189015.1	NC_003182.1
Myrichthys_maculosus	MT888998.1	JX190252	JX190399	JX190539	NA	NA	NC_013635.1
Myripristis_violacea	HM034239	JX190330	JX190474	JX190597	JX190861	JX191320	NA
Nansenia_ardesiaca	AP004106	JX190281	JX190425	NA	NA	JX191277	NC_004596.1
Naso_lituratus	HM034244	JX190354	EF536292	EF536254	EF530092	EF533915	NA
Neochanna_burrowsius	NA	JX190296	JX190439	JN132600.1	JN232658	JN132802.1	DQ149815.1
Neonesthes_capensis	KF768171	JX190301	JX190445	JX190572	GQ860322.1	JX191293	NA
Neosalanx_jordani	HM151574	HQ916019	NA	NA	HQ916058	HQ916188	AY279374.1
Neoscopelus_microchir	KF768172	JX190309	JX190456	JX190581	KC442197.1	JX191303	NA
Normichthys_operosus	FJ918918	NA	FJ918852	KC828361.1	FJ896431	FJ906650	NC_011009.1
Novumbra_hubbsi	HQ557339	JX190285	JX190429	NA	AY380546	NA	NC_022455.1
Ogcocephalus_nasutus	KF027500.1	JX190371	JX190510	JX190634	KF027942.1	KF028253.1	KF027540.1
Omosudis_lowii	EU366566	KM981878.1	KM981903.1	EU366662	EU366707	EU366750	AP004210.1
Oncorhynchus_mykiss	ON097695.1	EF032989.1	EF032924.1	EF033015.1	AF137176.1	EF032911.1	NC_001717.1
Ophioblennius_atlanticus	FJ583755	JX188810	JX189749	JX189431	JX189911	JX189136	AF323034.1
Opsanus_pardus	KF461213.1	JX190335	JX190479	JX190602	JX190866	NA	NA
Opsariichthys_uncirostris	AB218897	JX190274	JX190417	JX190562	JX190819	JX191270	LC098423.1
Oryzias_latipes	AP004421	Ensembl	Ensembl	Ensembl	Ensembl	Ensembl	NC_004387.1
Osmerus_mordax	JQ354253	JX190287	JX190431	JX190566	JX190827	JX191282	NC_015246.1
Oxycheilinus_celebicus	OQ385588.1	JX188789	JX189733	NA	JX189888	JX189116	KY815897.1
Pachypanchax_playfairii	MW029476.1	JX190385	NA	NA	JX190914	JX191367	MW029476.1
Paraliparis_meganchus	NA	JX190388	JX190526	NA	JX190916	JX191369	NA
Paratilapia_polleni	AY263886	JX188772	JX189711	JX189397	JX189869	JX189095	NC_011170.1
Paraulopus_oblongus	EU366568	KX227835.1	KX227875.1	EU366664	EU366709	EU366752	NA
Parupeneus_multifasciatus	KF768173	NA	NA	NA	KF768157	KF768163	NC_024192.1
Percopsis_omiscomaycus	EU524269	JX188681	JQ352809	JQ352854	JX189783	JQ353121	NC_068672.1
Platax_teira	HQ149897	NA	EF536282	EF536244	EF530083	EF533905	NC_024580.1
Plecoglossus_altivelis	NC002734	HQ916036	JN132547.1	JN132585.1	HQ916078	HQ916208	AB047553.2
Polymixia_japonica	AB034826.1	JX188676	JX189626	JX189311	JX189778	JX189010	NC_002648.1
Polyodon_spathula	JN028275	NA	NA	JX190530	JX190801	JX191245	NC_004419.1
Polypterus_ornatipinnis	AP004351	JX190244	NA	JX190528	JX190799	JX191243	NC_001778.1
Porichthys_notatus	JQ354298	JX190336	JX190480	JX190603	JX190867	JX191325	NA
Poromitra_crassiceps	JQ354300	JX190326	JX190470	JX190593	JX190857	JX191316	NA
Prognathodes_aculeatus	KT883642.1	JX190351	JX190494	JX190619	JX190884	JX191340	FJ167725.1
Protosalanx_chinensis	JN242658	HQ915999	JN132551.1	JN132589.1	HQ916039	HQ916166	NC_042393.1
Psettodes_erumei	EF609580	JX190363	JX190503	JX190626	JX190893	JX191347	NC_020032.1
Pseudochromis_fridmani	MF124013.1	JX188750	JX189691	JX189377	JX189849	JX189075	NA
Pseudopleuronectes_americanus	EU752158	JX188830	JX189771	JX189452	JX189931	JX189157	MH031927.1
Pseudotrichonotus_altivelis	EU366570	KX227838.1	KX227880.1	NA	EU366711	EU366754	AP004205.1
Ptychochromis_grandidieri	AY263878	JX188774	JX189713	JX189399	JX189871	JX189097	MW630972.1
Rachycentron_canadum	JQ841349	JX190344	JX190489	JX190614	JX190878	JX191335	NC_011219.1
Ranzania_laevis	HQ167729	JX190376	JX190514	JX190638	JX190903	JX191356	NC_007887.1
Regalecus_russelii	KU943114.1	JX190315	JX190460	JX190585	KF141347.1	JX191309	NA
Retropinna_semoni	FJ918924	JX190290	JX190433	NA	JX190829	JX191284	JN232588.1
Rheocles_wrightae	AY290803	JX188685	JX189633	JX189318	JX189788	JX189020	KC133646.1
Rhinesomus_triqueter	JQ861018	JX188835	JX189776	JX189457	JX189936	JX189161	JQ861161.1
Rogadius_asper	KP267610.1	KF139871	KF140114	KF140844.1	KF141350	KF140632.1	NA
Rondeletia_loricata	EU148304	JX190328	JX190472	JX190595	JX190859	JX191318	NA
Salangichthys_microdon	FJ205609	HQ916024	JN132552.1	JN132590.1	HQ916063	HQ916193	NC_004599.1
Salarias_fasciatus	FJ584077	KF139872.1	KF678589.1	KF140845.1	HQ168820	KC830868.1	MW630969.1
Salvelinus_alpinus	JX960951	JX190299	JX190443	JX190570	JX190833	JX191291	KY122150.1
Samariscus_latus	NC_024263.1	JX190364	NA	JX190627	JX190894	NA	NC_024263.1
Sarda_sarda	JQ623978	JX188822	JX189763	JX189445	JX189923	JX189150	NC_052756.1
Sargocentron_cornutum	FJ237590	JX190331	JX190475	JX190598	JX190862	JX191321	NA
Saurida_tumbil	KF768174	KX227842.1	KX227884.1	NA	KF768158	KF768164	NA
Scatophagus_argus	JN021250	JX188820	JX189761	JX189443	JX189921	JX189148	MN909969.1
Scolopsis_bilineata	OQ387184.1	JX188734	JX189680	JX189363	JX189835	JX189063	KT883701.1
Scopelengys_tristis	KF768175	JX190310	JX190457	MG816299.1	NA	JX191304	NC_020149.1
Scopelosaurus_harryi	EU366572	KX227843.1	KX227885.1	EU366666	EU366713	EU366756	NA
Sebastes_fasciatus	NC_036048.1	JX188703	JX189655	JX189337	JX189809	JX189038	NC_036048.1
Sebastolobus_alascanus	JQ354498	JX188704	JX189656	JX189338	JX189810	JX189039	AF031497.1
Selenotoca_multifasciata	DQ107759	JX190356	JX190497	JX190622	JX190887	JX191343	NC_026919.1
Seriola_dumerili	JX261426	JX188707	JX189659	JX189341	JX189813	JX189042	MZ398238.1
Serranus_tigrinus	JQ843057	JX188763	JX189704	JX189390	JX189862	JX189088	AY321793.1
Siganus_spinus	JQ432159	JX190357	EF536305	EF536267	EF530104	EF533928	AY190554.1
Sphyraena_barracuda	JQ842711	JX190360	JX190500	JX190625	JX190890	JX191346	NC_022484.1
Stegastes_leucostictus	JQ841016	JX188797	JX189740	JX189418	JX189898	JX189125	NA
Sternoptyx_pseudobscura	KF768176	NA	KX227887.1	KX227909.1	KF768159	KF768165	NA
Stokellia_anisodon	NA	JX190291	JX190434	NA	JX190830	JX191285	MZ301682.1
Stomias_atriventer	KF768177	NA	GQ860483.1	KX227910.1	GQ860325.1	KF768166	NC_037248.1
Stylephorus_chordatus	AB280689	JX190319	JX190463	JX190587	EF094952	JX191312	NC_009948.1
Sudis_atrox	EU366576	KM981880.1	KM981905.1	EU366670	EU366717	EU366759	NA
Symphurus_atricaudus	GU440541	JX190362	JX190502	NA	JX190892	NA	DQ082908.1
Syngnathus_fuscus	JN312447	JX190338	JX190484	NA	NA	NA	AF356056.1
Synodus_kaianus	EU366578	KX227846.1	KX227890.1	EU366672	EU366719	EU366761	AP004202.1
Tetraodon_miurus	NC15361	JX190378	JX190516	JX190639	JX190905	JX191358	JQ681930.1
Thymallus_brevirostris	NC_027412.1	JX190300	JX190444	JX190571	JX190834	JX191292	KJ866486.1
Toxotes_jaculatrix	HQ654759	JX188767	JX189708	JX189394	JX189866	JX189092	NA
Trachinotus_carolinus	JX034020	JX188708	JX189660	JX189342	JX189814	JX189043	NC_024184.1
Trachipterus_arcticus	KC442073.1	JX190316	JX190461	NA	JX190849	JX191310	NA
Triacanthodes_anomalus	AP009172	JX188836	JX189777	JX189458	JX189937	JX189162	NA
Triacanthus_biaculeatus	JF952881	JX190379	JX190517	JX190640	JX190906	JX191359	NC_009863.1
Umbra_limi	EU522452	JX190286	JX190430	NA	JX190826	JX191281	AY497458.1
Xenentodon_cancila	FJ459539	JX188688	JX189636	JX189321	JX189791	JX189023	NA
Xiphias_gladius	JQ624016	JX190383	JX190523	JX190646	JX190912	JX191365	AB470301.1
Zanclus_cornutus	JQ350417	JX190359	JX190499	JX190624	JX190889	JX191345	NC_009852.1
Zenopsis_conchifer	KC016045.1	JX190322	JX190466	JX190589	JX190853	NA	NA
Zeus_faber	HQ945864	JX190323	JX190467	JX190590	JX190854	EU001894.1	NC_063705.1
