# Supplementary material for: Illuminating the Past: Coral Reefs Facilitate Diversification of Biofluorescence in Ray-finned Fishes
Source: Research Square preprint supplement (doi:10.21203/rs.3.rs-4513221/v1), 2024-07-19
Supplement: Supplementary file 11 [file Supplementary 9.xlsx]

## Sheet: Sheet1
Family	Mean NodeAge	95% HPD Interval
Gasterosteidae-Hypoptychidae	11.05	0-30.23
Eurypharyngidae-Nettastomatidae	13.05	0-37.64
Cynoglossidae-Soleidae	13.4	0-37.35
Eleotridae-Gobiidae	15.5	0-43.76
Chaunacidae-Himantolophidae	17.18	0-44.71
Antennariidae-Histiophrynidae	17.22	0-44.56
Coryphaenidae-Rachycentridae	19.75	0-42.15
Centriscidae-Syngnathidae	20.23	0-55.8
Aplocheilidae-Poeciliidae	20.46	0-54.55
Belonidae-Hemiramphidae	20.47	0.002-54.62
Epinephelidae-Liopropomatidae	20.55	0-55.19
Macrouridae-Lotidae	20.67	0.002-54.23
Dactyloscopidae-Labrisomidae	21.12	0.004-53.56
Bothidae-Pleuronectidae	21.16	0-52.87
Toxotidae-Xiphiidae	21.51	0-57.65
Argentinidae-Opisthoproctidae	21.61	0-62.88
Characidae-Ictaluridae	22.12	0-64.97
Synodontidae1-Synodontidae2	22.27	0.003-65.28
Cottidae-Liparidae	23.55	1.38-48.71
Zoarcidae	23.61	1.75-49.11
Fistulariidae-Mullidae	25	0.002-64.6
Lethrinidae-Nemipteridae	25.7	0-70.45
Triacanthidae-Triacanthodidae	26.44	0.001-58.26
Centropomidae-Latidae	27.4	0.01-66.35
Gobiesocidae-Tripterygiidae	27.76	0.001-67.95
Helostomatidae-Osphronemidae	28.03	0.001-78.19
Samaridae	28.91	1.97-61.03
Aracanidae-Ostraciidae	30.46	0.001-68.42
Regalecidae-Trachipteridae	30.76	0.001-67.71
Barbourisiidae-Rondeletiidae	31.35	0.004-79.08
Callionymidae	34.17	1.79-73.43
Acanthuridae-Zanclidae	34.68	2.53-73.7
Chlopsidae-Muraenidae	36.38	0.001-91.21
Bythitidae-Ophidiidae	37.51	0.001-101.1
Amblyopsidae-Aphredoderidae	39.84	32.66-51.06
Congridae-Ophichthidae	41.1	2.7-86.35
Echeneidae	43.53	32.12-58.23
Ephippidae-Sciaenidae	45.68	0.001-108.37
Chlorophthalmidae-Scopelarchidae	46.36	0.003-109.57
Stylephoridae	46.5	7.75-80.36
Serranidae	46.83	3.8-89.39
Anguillidae	47.21	7-92.88
Bathysauridae-Ipnopidae	47.71	1.76-103
Blenniidae	47.79	12.58-88.28
Sebastidae	48.12	18.18-80.49
Scombridae-Trichiuridae	48.16	0-119.76
Balistidae-Monacanthidae	48.648	38.85-62.11
Menidae	49.19	5.35-91.06
Berycidae-Melamphaidae	49.85	7.86-97.45
Gonostomatidae-Sternoptychidae	50.03	3.32-108.36
Plecoglossidae-Salangidae	50.41	7.35-100.92
Microstomatidae	50.42	1.9-113.6
Centrarchidae-Elassomatidae	50.74	11.44-94.36
Rhamphichthyidae	51.83	1.83-114.85
Pseudotrichonotidae	52.09	2.14-116.12
Chaetodontidae-Leiognathidae	53.76	17.92-90.7
Adrianichthyidae-Cichlidae	54.17	4.69-108.14
Ogcocephalidae	55.31	0.001-58.73
Apogonidae-Kurtidae	55.4	0.004-138.65
Platycephalidae	57.95	24.56-93.28
Luvaridae	58.21	14.93-101.35
Parazenidae-Zeidae	58.3	32.67-51.06
Elopidae-Megalopidae	59.11	0.001-156.66
Esocidae-Umbridae	60.64	15.98-172.91
Siganidae	60.68	6.91-113.26
Diodontidae-Tetraodontidae	61.06	51.37-74.28
Alepocephalidae-Platytroctidae	64.05	0.001-170.03
Percopsidae	65.64	36.4-80.4
Synbranchidae	67.49	6.34-129.53
Mugilidae-Pomacentridae	67.58	15.12-120.53
Bedotiidae	68.74	19.41-119
Nototheniidae	69.03	33.3-107.62
Percichthyidae	69.85	23.35-118.95
Pomacanthidae	69.94	31.23-108.74
Carangidae	70.03	57.17-88.1
Monocentridae-Trachichthyidae	70.07	4.37-139.9
Amiidae-Lepisosteidae	71.94	0.003-204.46
Lophiidae	72.01	35.86-106.7
Molidae	72.96	54.66-94.47
Lampridae	73.33	57.06-101.83
Osmeridae	76.36	22.94-135.22
Sphyraenidae	81.8	40.6-122.36
Pseudochromidae	83.79	38.7-130.92
Giganturidae	85.54	19.16-147.55
Stomiidae	90.46	22.99-158.32
Bathylagidae	92.1	15.98-172.91
Cirrhitidae	93.88	43.57-143.97
Percidae	94.3	53.64-135.52
Xenocyprididae	95.41	20.08-168.26
Aulopidae	95.97	20.2-170.37
Batrachoididae	96.62	21.3-172.8
Scatophagidae	99.18	71.38-127.19
Aulostomidae	102.77	47.5-159.68
Holocentridae	103.49	44.34-164.5
Polymixiidae	104.3	94.15-122.84
Myctophidae-Neoscopelidae	104.46	20.56-189.95
Retropinnidae	104.63	42.86-170.51
Alepisauridae-Omosudidae	106.97	100.82-115.97
Lateolabracidae	108.71	67.59-150.69
Salmonidae	113.74	60.96-180.59
Paralepididae	115.16	102.2-133.4
Psettodidae	115.55	80.08-153.58
Halosauridae	115.75	49.15-187.85
Mormyridae-Notopteridae	121.47	101.62-151.87
Moronidae	130.13	96.34-164.69
Notosudidae	133.87	108.51-162.72
Chanidae-Kneriidae	137.64	134.21-143.38
Albulidae	145.2	68.61-228.44
Labridae	148.14	114.04-184.92
Gonorynchidae	151.9	134.98-179.58
Paraulopidae	156.32	122.26-194.23
Galaxiidae	173.74	104.66-236.45
Hiodontidae	173.78	108.33-256.08
Synodontidae3	184.29	143.61-227.22
Denticipitidae	188.6	145.45-236.09
Ateleopodidae	208.5	166.51-252.09
Lepidogalaxiidae	230.55	183.74-278.8
Polyodontidae	340	326.42-363.04
Polypteridae	392.37	383.17-407.9
